# Supplementary material for: Cohort profile: the Western Cape Pregnancy Exposure Registry (WCPER)
Source: PubMed Central journal article supplement (PMC9244673; doi:10.1136/bmjopen-2021-060205), 2022-06-29
Supplement: bmjopen-2021-060205.draft_revisions.pdf [file bmjopen-2021-060205.draft_revisions.pdf]

# BMJ Open

BMJ Open is committed to open peer review. As part of this commitment we make the peer review history of every article we publish publicly available.

When an article is published we post the peer reviewers' comments and the authors' responses online. We also post the versions of the paper that were used during peer review. These are the versions that the peer review comments apply to.

The versions of the paper that follow are the versions that were submitted during the peer review process. They are not the versions of record or the final published versions. They should not be cited or distributed as the published version of this manuscript.

BMJ Open is an open access journal and the full, final, typeset and author-corrected version of record of the manuscript is available on our site with no access controls, subscription charges or pay-per-view fees (<http://bmjopen.bmj.com>).

If you have any questions on BMJ Open's open peer review process please email [info.bmjopen@bmj.com](mailto:info.bmjopen@bmj.com)

# BMJ Open

## Cohort Profile: The Western Cape Pregnancy Exposure Registry (WCPER)

|                               |                                                                                                                                                                                                                                                                                                                                                                                                                                                                                                                                                                                                                                                                                                                                                                                                                                                                                                                                                                                                                                                                                                                                                                                                                                                                                                                                                                                                                                                                                                                                                                                                                                                                                                                                                                                                                                                                                                                                                                                                                                                                                                                                                                                                                                                                                                                                                                                                                                                                                                                                                                                                                    |
|-------------------------------|--------------------------------------------------------------------------------------------------------------------------------------------------------------------------------------------------------------------------------------------------------------------------------------------------------------------------------------------------------------------------------------------------------------------------------------------------------------------------------------------------------------------------------------------------------------------------------------------------------------------------------------------------------------------------------------------------------------------------------------------------------------------------------------------------------------------------------------------------------------------------------------------------------------------------------------------------------------------------------------------------------------------------------------------------------------------------------------------------------------------------------------------------------------------------------------------------------------------------------------------------------------------------------------------------------------------------------------------------------------------------------------------------------------------------------------------------------------------------------------------------------------------------------------------------------------------------------------------------------------------------------------------------------------------------------------------------------------------------------------------------------------------------------------------------------------------------------------------------------------------------------------------------------------------------------------------------------------------------------------------------------------------------------------------------------------------------------------------------------------------------------------------------------------------------------------------------------------------------------------------------------------------------------------------------------------------------------------------------------------------------------------------------------------------------------------------------------------------------------------------------------------------------------------------------------------------------------------------------------------------|
| Journal:                      | <i>BMJ Open</i>                                                                                                                                                                                                                                                                                                                                                                                                                                                                                                                                                                                                                                                                                                                                                                                                                                                                                                                                                                                                                                                                                                                                                                                                                                                                                                                                                                                                                                                                                                                                                                                                                                                                                                                                                                                                                                                                                                                                                                                                                                                                                                                                                                                                                                                                                                                                                                                                                                                                                                                                                                                                    |
| Manuscript ID                 | bmjopen-2021-060205                                                                                                                                                                                                                                                                                                                                                                                                                                                                                                                                                                                                                                                                                                                                                                                                                                                                                                                                                                                                                                                                                                                                                                                                                                                                                                                                                                                                                                                                                                                                                                                                                                                                                                                                                                                                                                                                                                                                                                                                                                                                                                                                                                                                                                                                                                                                                                                                                                                                                                                                                                                                |
| Article Type:                 | Cohort profile                                                                                                                                                                                                                                                                                                                                                                                                                                                                                                                                                                                                                                                                                                                                                                                                                                                                                                                                                                                                                                                                                                                                                                                                                                                                                                                                                                                                                                                                                                                                                                                                                                                                                                                                                                                                                                                                                                                                                                                                                                                                                                                                                                                                                                                                                                                                                                                                                                                                                                                                                                                                     |
| Date Submitted by the Author: | 15-Dec-2021                                                                                                                                                                                                                                                                                                                                                                                                                                                                                                                                                                                                                                                                                                                                                                                                                                                                                                                                                                                                                                                                                                                                                                                                                                                                                                                                                                                                                                                                                                                                                                                                                                                                                                                                                                                                                                                                                                                                                                                                                                                                                                                                                                                                                                                                                                                                                                                                                                                                                                                                                                                                        |
| Complete List of Authors:     | <p>Kalk, Emma; University of Cape Town Faculty of Health Sciences, Centre for Infectious Disease Epidemiology &amp; Research</p> <p>Heekes, Alexa; University of Cape Town Faculty of Health Sciences, Centre for Infectious Disease Epidemiology &amp; Research; Western Cape Department of Health, Health Intelligence Directorate</p> <p>Slogrove, Amy; Stellenbosch University, Ukwanda Centre for Rural Health, Department of Global Health; Stellenbosch University, Department of Paediatrics &amp; Child Health</p> <p>Phelanyane, Florence; University of Cape Town Faculty of Health Sciences, Centre for Infectious Disease Epidemiology &amp; Research; Western Cape Department of Health, Health Intelligence Directorate</p> <p>Davies, Mary-Ann; University of Cape Town Faculty of Health Sciences, Centre for Infectious Disease Epidemiology &amp; Research; Western Cape Department of Health, Health Intelligence Directorate</p> <p>Myer, Landon; University of Cape Town Faculty of Health Sciences, Division of Epidemiology &amp; Biostatistics</p> <p>Euvrard, Jonathan; University of Cape Town Faculty of Health Sciences, Centre for Infectious Disease Epidemiology &amp; Research; Western Cape Department of Health, Health Intelligence Directorate</p> <p>Kroon, Max; University of Cape Town Faculty of Health Sciences, Neonatology; Mowbray Maternity Hospital, Neonatal Services</p> <p>Petro, Greg; University of Cape Town Faculty of Health Sciences, Department of Obstetrics &amp; Gynaecology; New Somerset Hospital, Maternity Services</p> <p>Fieggen, Karen; University of Cape Town Faculty of Health Sciences, Division of Human Genetics; Groote Schuur Hospital, Medical Genetics Services</p> <p>Stewart, Chantal; University of Cape Town Faculty of Health Sciences, Department of Obstetrics &amp; Gynaecology; Mowbray Maternity Hospital, Maternity Services</p> <p>Rhoda, Natasha; University of Cape Town Faculty of Health Sciences, Department of Paediatrics and Child Health; Mowbray Maternity Hospital, Neonatal Services</p> <p>Gebhardt, Stefan; Stellenbosch University, Department of Obstetrics &amp; Gynaecology; Tygerberg Hospital, Maternity Services</p> <p>Osman, Ayesha; University of Cape Town Faculty of Health Sciences, Department of Obstetrics &amp; Gynaecology; Groote Schuur Hospital, Maternity Services</p> <p>Anderson, Kim; University of Cape Town Faculty of Health Sciences, Centre for Infectious Disease Epidemiology &amp; Research</p> <p>Boulle, Andrew; University of Cape Town Faculty of Health Sciences,</p> |

1  
2  
3  
4  
5  
6  
7  
8  
9  
10  
11  
12  
13  
14  
15  
16  
17  
18  
19  
20  
21  
22  
23  
24  
25  
26  
27  
28  
29  
30  
31  
32  
33  
34  
35  
36  
37  
38  
39  
40  
41  
42  
43  
44  
45  
46  
47  
48  
49  
50  
51  
52  
53  
54  
55  
56  
57  
58  
59  
60

|           |                                                                                                                                                                                                                                                      |
|-----------|------------------------------------------------------------------------------------------------------------------------------------------------------------------------------------------------------------------------------------------------------|
|           | Centre for Infectious Disease Epidemiology & Research; Western Cape Department of Health, Health Intelligence Directorate<br>Mehta, Ushma; University of Cape Town Faculty of Health Sciences, Centre for Infectious Disease Epidemiology & Research |
| Keywords: | PUBLIC HEALTH, EPIDEMIOLOGY, Maternal medicine < OBSTETRICS, Fetal medicine < OBSTETRICS                                                                                                                                                             |
|           |                                                                                                                                                                                                                                                      |

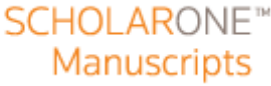

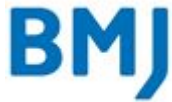

I, the Submitting Author has the right to grant and does grant on behalf of all authors of the Work (as defined in the below author licence), an exclusive licence and/or a non-exclusive licence for contributions from authors who are: i) UK Crown employees; ii) where BMJ has agreed a CC-BY licence shall apply, and/or iii) in accordance with the terms applicable for US Federal Government officers or employees acting as part of their official duties; on a worldwide, perpetual, irrevocable, royalty-free basis to BMJ Publishing Group Ltd ("BMJ") its licensees and where the relevant Journal is co-owned by BMJ to the co-owners of the Journal, to publish the Work in this journal and any other BMJ products and to exploit all rights, as set out in our [licence](#).

The Submitting Author accepts and understands that any supply made under these terms is made by BMJ to the Submitting Author unless you are acting as an employee on behalf of your employer or a postgraduate student of an affiliated institution which is paying any applicable article publishing charge ("APC") for Open Access articles. Where the Submitting Author wishes to make the Work available on an Open Access basis (and intends to pay the relevant APC), the terms of reuse of such Open Access shall be governed by a Creative Commons licence – details of these licences and which [Creative Commons](#) licence will apply to this Work are set out in our licence referred to above.

Other than as permitted in any relevant BMJ Author's Self Archiving Policies, I confirm this Work has not been accepted for publication elsewhere, is not being considered for publication elsewhere and does not duplicate material already published. I confirm all authors consent to publication of this Work and authorise the granting of this licence.

1  
2  
3 *Cohort Profile: The Western Cape Pregnancy Exposure Registry (WCPER)*  
4  
5

6 Authors: Emma Kalk<sup>1\*</sup>, Alexa Heekes<sup>1,2</sup>, Amy Slogrove<sup>3,4</sup>, Florence Phelanyane<sup>1,2</sup>, Mary-Ann Davies<sup>1,2</sup>,  
7  
8 Landon Myer<sup>5</sup>, Jonathan Euvrard<sup>1,2</sup>, Max Kroon<sup>6,7</sup>, Greg Petro<sup>8,9</sup>, Karen Fieggen<sup>10,11</sup>, Chantal Stewart<sup>8,12</sup>,  
9  
10 Natasha Rhoda<sup>6,7</sup>, Stefan Gebhardt<sup>13,14</sup>, Ayesha Osman<sup>8,15</sup>, Kim Anderson<sup>1</sup>, Andrew Boulle<sup>1,2†</sup>, Ushma  
11  
12 Mehta<sup>1†</sup>  
13  
14

15  
16 1. Centre for Infectious Disease Epidemiology & Research and Division of Public Health Medicine,  
17  
18 School of Public Health & Family Medicine, University of Cape Town, South Africa  
19

20  
21 2. Health Intelligence Directorate, Western Cape Government Health, Cape Town, South Africa  
22

23  
24 3. Department of Paediatrics & Child Health, Faculty of Medicine & Health Sciences, Stellenbosch  
25  
26 University, Worcester, South Africa  
27

28  
29 4. Ukwanda Centre for Rural Health, Department of Global Health, Faculty of Medicine & Health  
30  
31 Sciences, Stellenbosch University, Worcester, South Africa  
32

33  
34 5. Division of Epidemiology & Biostatistics, School of Public Health & Family Medicine, University of  
35  
36 Cape Town, South Africa  
37

38  
39 6. Department of Paediatrics and Child Health, University of Cape Town, South Africa  
40

41  
42 7. Mowbray Maternity Hospital, Neonatal Services, Cape Town, South Africa  
43

44  
45 8. Department of Obstetrics & Gynaecology, University of Cape Town, South Africa  
46

47  
48 9. New Somerset Hospital, Maternity Services, Cape Town, South Africa  
49

50  
51 10. Division of Human Genetics, University of Cape Town, Cape Town, South Africa  
52

53  
54 11. Groote Schuur Hospital, Medical Genetics Service, Cape Town, South Africa  
55

56  
57 12. Mowbray Maternity Hospital, Maternity Services, Cape Town, South Africa  
58

59  
60 13. Department of Obstetrics & Gynaecology, Stellenbosch University, Cape Town, South Africa

1  
2  
3 14. Tygerberg Hospital Maternity Services, Cape Town, South Africa  
4  
5

6 15. Groote Schuur Hospital, Maternity Services, Cape Town South Africa  
7  
8  
9

10  
11  
12 \*corresponding author: Centre for Infectious Disease Epidemiology & Research, School of Public

13  
14 Health & Family Medicine, 5<sup>th</sup> floor Falmouth Building, University of Cape Town Faculty of Health

15  
16 Sciences, Anzio Road, Observatory, Cape Town  
17

18  
19 [emma.kalk@uct.ac.za](mailto:emma.kalk@uct.ac.za)  
20  
21

22 † Joint senior authors  
23  
24  
25  
26  
27  
28  
29  
30  
31  
32  
33  
34  
35  
36  
37  
38  
39  
40  
41  
42  
43  
44  
45  
46  
47  
48  
49  
50  
51  
52  
53  
54  
55  
56  
57  
58  
59  
60

## ABSTRACT

Purpose: The Western Cape Pregnancy Exposure Registry (PER) was established at two public sector healthcare sentinel sites in the Western Cape province, South Africa to provide on-going surveillance of drug exposures in pregnancy and associations with pregnancy outcomes.

Participants: Established in 2016, all women attending their first antenatal visit at primary care obstetric facilities were enrolled and followed to pregnancy outcome regardless of the site (i.e., primary, secondary, tertiary facility). Routine operational obstetric and medical data are digitized from the clinical stationery at the health care facilities. Data collection has been integrated into existing services and information platforms and supports routine operations. The PER is situated within the Provincial Health Data Centre, an information exchange that harmonizes and consolidates all health-related electronic data in the province. Data are contributed via linkage across a unique identifier. This relationship limits the missing data in the PER, allows validation and avoids misclassification in the population-level dataset.

Findings to date: Approximately 5000 and 3500 pregnant women enter the dataset annually at the urban and rural sites, respectively. As of August 2021, >30 000 pregnancies have been recorded and outcomes have been determined for 93%. Analysis of key obstetric and neonatal health indicators derived from the PER are consistent with the aggregate data in the District Health Information System.

Future plans: This represents significant infrastructure, able to address clinical and epidemiological concerns in a low/middle-income setting.

### Key words

Pregnancy Exposure Registry, Pharmacovigilance, Surveillance

### Strengths and Limitations of this Study

The Western Cape Pregnancy Exposure Registry (PER) was established to provide on-going surveillance of drug exposures in pregnancy and associations with pregnancy outcomes. The system comprises unique infrastructure able to address clinical and public health concerns in a low-middle income setting.

Data collection has been integrated into existing services and information platforms and supports routine operations.

The PER is situated within the Provincial Health Data Centre, an information exchange that harmonizes and consolidates all health-related electronic data in the province; this relationship limits the missing data in the PER, allows validation and avoids misclassification in the population-level dataset.

The PER digitizes clinical data recorded in operational stationery and we cannot control for data quality nor account for missing data in the source documents and unmeasured confounders.

Medicines obtained outside the public sector systems and traditional and complementary medicines are not included unless they are documented in the clinical stationery.



## *Cohort Profile: The Western Cape Pregnancy Exposure Registry*

### Introduction

Assessing medicine and vaccine safety in pregnancy requires on-going surveillance across multiple settings. In high-income countries, reviews of outpatient prescriptions and self-medication during pregnancy estimated exposure rates of up to 93% and 43%, respectively, excluding vitamins and supplements[1, 2]. Reports from Africa, the site of mass prevention and treatment campaigns for HIV, tuberculosis and malaria, are less frequent: we estimate that 79% - 99% of women in Cape Town use medicines antenatally[3].

Pregnant women have been systematically excluded from pharmaceutical trials and the efficacy, dosing and safety of many medicines used during pregnancy are uncertain. Post-authorization safety assessments have traditionally relied on passive reporting of suspected medicine-related adverse events. Such systems are limited by their dependence on voluntary reporting, variable data quality, absence of background rates of adverse birth outcomes including common congenital disorders, and lack of data to establish a denominator.

Recently, pharmacovigilance in pregnancy has drawn public and political attention following concerns about the association between the antiretroviral integrase inhibitor, dolutegavir, and neural tube defects[4, 5], the potential risk of isoniazid preventive therapy in women living with HIV[6] (WLHIV), and SARS-CoV-2 vaccines[7].

Pregnancy Exposure Registries (PER) are a form of surveillance, designed to iteratively detect adverse events within a defined pregnant population. Importantly, the prospective nature of PER allows collection of exposure and other data before the pregnancy outcome is known. The pharmaceutical

1  
2  
3 industry maintains drug-specific registries for medicines and/or drug classes with known/suspected  
4 teratogenic effects or as part of post-marketing commitments; e.g., the Antiretroviral Pregnancy and  
5 Anti-Epileptic Drug Registries[8, 9]. In addition, teratology information services may collect data on  
6 pregnancy exposures. These PER depend on voluntary enrolment by clinicians and/or women, and  
7 many do not directly collect data from comparator groups but rely either on internal comparators or  
8 on an identified external comparator to provide background prevalence data[10]. Background rates  
9 of adverse maternal and obstetric outcomes are necessary to determine deviations from expected  
10 proportions (signals). Such data may be limited or lacking in low- and middle-income countries[11, 12]  
11 or differ sufficiently from the source population so as to introduce bias (e.g., use of the Metropolitan  
12 Atlanta Congenital Defects Program as external comparator for USA-based studies[10].)  
13  
14  
15  
16  
17  
18  
19  
20  
21  
22  
23  
24  
25  
26  
27  
28

29 The World Health Organization (WHO) has developed a PER approach for resource-limited settings  
30 aimed at prospective data collection on exposures in a cohort of pregnant women attending antenatal  
31 care services at sentinel sites. Important for validity and causality determination, the approach  
32 recommends inclusion of *all* women presenting to the site to allow concurrent establishment of  
33 background rates and assessment of multiple potential exposures[13].  
34  
35  
36  
37  
38  
39  
40  
41  
42  
43

44 The Western Cape (WC) PER was established in Cape Town in 2016, adapted from the WHO template.  
45 It was nested within the province-wide health information exchange, a component within a larger  
46 project designed to assess the impact of WHO Option B+ for vertical HIV transmission prevention (i.e.,  
47 universal lifelong antiretroviral therapy [ART] for pregnant and breast-feeding women) at the  
48 population and individual levels[14]. Situating the PER within the linked information exchange avoided  
49 some of the limitations of exclusive primary-care databases in that both electronic inpatient and  
50 outpatient prescriptions are recorded as well as those from specialist and other off-site clinics, sources  
51 which may be absent from primary-care records[3, 15, 16]. The design also supports augmentation of  
52  
53  
54  
55  
56  
57  
58  
59  
60

1  
2  
3 the electronic clinical record for enrolled women, while providing a more secure, sustainable, and  
4  
5 ethically-viable platform for capturing clinical data on mothers and infants.  
6  
7  
8  
9

10  
11 We took a pragmatic approach to the establishment of the PER based on the availability of resources  
12  
13 and the desire to integrate into existing systems and operational routines, avoiding a parallel  
14  
15 infrastructure and supporting longevity. Data generated by the initiative are available for the  
16  
17 evaluation and improvement of clinical care as well as epidemiological review.  
18  
19  
20  
21  
22

### 23 Cohort description

24  
25  
26 The PER has been established at two sentinel sites in the WC. Gugulethu Midwife Obstetric Unit  
27  
28 (GMOU) provides obstetric care to approximately 5000 women annually in Gugulethu, Cape Town a  
29  
30 low-income area with high unemployment and an antenatal HIV prevalence of approximately 30%.  
31  
32 GMOU refers patients to Mowbray Maternity (secondary) and Groote Schuur (tertiary) Hospitals.  
33  
34 About half of all women who attend GMOU are referred to hospital, antenatally or perinatally.  
35  
36 Worcester MOU (WMOU) is situated adjacent to the Worcester Provincial Hospital in Worcester, a  
37  
38 town of approximately 230 000 in a farming community 120 kilometers outside Cape Town. WMOU  
39  
40 provides delivery services for ~3600 women annually. The antenatal HIV prevalence is approximately  
41  
42 16%. Women requiring more advanced care are referred to Worcester (secondary) and Tygerberg  
43  
44 (tertiary) Hospitals. The community is structurally disadvantaged, and many depend on seasonal  
45  
46 employment on farms. In both areas the population is mobile; women move within the WC province  
47  
48 and may deliver outside the proscribed referral axes.  
49  
50  
51  
52  
53  
54  
55  
56

57 Enrolment started at GMOU in Cape Town in September 2016 and at WMOU in January 2018.  
58  
59  
60

1  
2  
3 All women seeking care at the sentinel primary-care sites were included. Most women who use public  
4 maternity services, including those with medical and obstetric complications, initially present to  
5 primary care, therefore **situating enrolment at the primary-care facility allowed us to capture a**  
6 **sample representative of the pregnant population in the geographic drainage area of that facility.**  
7  
8  
9

#### 10 11 12 13 14 15 16 Maternal and Child Health Services in the Western Cape

17  
18  
19 Obstetric care is free at the point of service and approximately 65% of women present at/before 20  
20 weeks gestation[17]. Antenatal care for uncomplicated pregnancies is provided at Basic Antenatal  
21 Clinics and MOU, the latter able to manage uncomplicated vaginal deliveries. At any stage during  
22 pregnancy or peri-partum women can be referred to district, regional or tertiary hospitals according  
23 to standard operating procedures. HIV testing is routine at timepoints throughout gestation and  
24 WLHIV are initiated/re-initiated on ART[18]; those already receiving ART may transfer their HIV care  
25 to the MOU. Clients with other underlying medical conditions (e.g., pre-existing hypertension,  
26 diabetes mellitus, cardiac conditions) and/or who develop pregnancy-related medical conditions (e.g.,  
27 hypertensive disorders of pregnancy, gestational diabetes) continue antenatal care at hospital. The  
28 MOU dispenses ART and antenatal supplements and preventive therapies recommended by the WHO  
29 in pregnancy (i.e. iron and folate supplements, tetanus and influenza vaccines)[19]. Midwives treat  
30 the common complaints of pregnancy (heartburn, nausea), urinary tract infection, vaginal candidiasis  
31 and provide syndromic treatment for sexually transmitted infections (STI). Frequently, these  
32 medicines are dispensed directly from *ward-stock* without a linked digital record, although details are  
33 recorded in paper-based registers.  
34  
35  
36  
37  
38  
39  
40  
41  
42  
43  
44  
45  
46  
47  
48  
49  
50  
51  
52  
53  
54  
55  
56  
57  
58  
59  
60

1  
2  
3 Within resource constraints, the WC endeavors to provide an antenatal ultrasound scan to clients  
4 before 22 weeks gestation for determining gestational age. If concerns are identified women are up-  
5 referred for formal fetal anomaly review.  
6  
7  
8  
9

10  
11  
12  
13 Antenatal visits, HIV testing, transfers and deliveries are recorded against patient names in individual  
14 paper-based registers. Monthly aggregate statistics of key obstetric indicators (Table 1) are manually  
15 counted from these registers and submitted centrally as part of the routine District Health Information  
16 System platform.  
17  
18  
19  
20  
21  
22  
23  
24  
25

#### 26 Follow-up

27  
28  
29 The Maternity Case Record (MCR) is a patient-held paper-based document distributed at the first  
30 antenatal visit that serves as a record of all clinical obstetric care until discharge after pregnancy  
31 outcome, regardless of level of care. It is utilized throughout South Africa and archived at the site of  
32 outcome. Chronic medication and any agents dispensed during pregnancy should be recorded in the  
33 MCR by the attending clinicians. However, medicines received at specialist clinics, during hospital  
34 admissions and over-the-counter medicines are often not documented [3, 15].  
35  
36  
37  
38  
39  
40  
41  
42  
43  
44  
45

46 After birth, live- and still-born neonates are examined by the attending clinician (nurse  
47 midwife/doctor) and the outcome of the limited neonatal surface examination is recorded in the MCR.  
48  
49 This examination has been shown to detect most major congenital malformations in neonates, i.e.  
50 those that are visible and do not require diagnostic tools[20]. At GMOU, a clinician employed by the  
51 PER performs a review of clinical records to obtain additional data for congenital disorders and  
52 stillbirths. In the case of stillbirth, the placenta may be sent for histological examination.  
53  
54  
55  
56  
57  
58  
59  
60

1  
2  
3 In the WC, most women (99%) give birth at a health facility[17]. Those who do not, will bring their  
4  
5 infants to the MOU soon after birth for review and registration.  
6  
7  
8  
9

10  
11 **For the purposes of the PER, the MCR serves as the primary source of prospectively-collected clinical**  
12  
13 **data.** Thus, women enter the cohort on first visit to the MOU and are followed up until pregnancy  
14  
15 outcome.  
16

#### 17 18 19 20 21 Data collection

22  
23  
24 The PER digitizes routinely-collected data from the clinical stationery if not already digitized under  
25  
26 existing service delivery. In addition to the patient-held MCR, data sources include primary-care dating  
27  
28 ultrasound reports, and the STI and labour ward delivery registers. As we are using operational data,  
29  
30 definitions have been aligned with operational clinical definitions in the WC. Using other routinely  
31  
32 collected data elements (gestational age, neonate anthropometry) we are able to align case  
33  
34 definitions with those of the Global Alignment of Immunization Safety Assessment in Pregnancy[21],  
35  
36 allowing for harmonization of data and meaningful comparisons with equivalent datasets.  
37  
38 Additionally, we collect or calculate health indicators for the routine monthly aggregate reports  
39  
40 required by the MOUs (Table 1).  
41  
42  
43  
44  
45  
46  
47

48 Externally-funded PER data clerks are embedded at the facilities and project-augmented data  
49  
50 collection is accommodated within the routine patient and document flow without disruption of  
51  
52 clinical care.  
53  
54  
55  
56  
57  
58  
59  
60

1  
2  
3 The provincial government of the WC operates as a single provider of public sector health services. A  
4  
5 9-digit numeric folder number which is common across the health platform for a given patient  
6  
7 facilitates the harmonization of all electronic health records within the Provincial Health Data Centre  
8  
9 (PHDC), the information exchange that consolidates all electronic administrative, pharmacy,  
10  
11 laboratory, and disease-specific information[14]. PER data are recorded against this identifier and  
12  
13 contribute to the PHDC.  
14  
15

16  
17  
18  
19  
20 All MOUs use the Primary Health Care Information Service (PHCIS) electronic medical records system  
21  
22 which records attendance against patient identifiers, and ART in WLHIV. PHCIS automatically  
23  
24 generates a unique folder number for live infants at birth, providing electronic linkage between  
25  
26 mother and baby. Clinicom performs this function at all hospitals. Data are imported daily by the  
27  
28 PHDC[14].  
29  
30

### 31 32 33 34 35 Completeness of Medicine Exposure data 36

37  
38 Electronic dispensing data in the PHDC is augmented by the PER which captures medicine exposures  
39  
40 elicited from the women during the clinical consultation and ward-stock medicines recorded by  
41  
42 clinicians in the MCR. The PER also records some lifestyle factors (weight gain, alcohol, tobacco,  
43  
44 recreational drugs) that may act as confounders for certain outcomes. Combining the electronic  
45  
46 pharmacy data in the PHDC strengthens the ascertainment of exposures, providing a complete list of  
47  
48 medication dispensed from public sector pharmacies. Using multiple data sources for this has been  
49  
50 shown to provide a more complete picture of antenatal medicine use essential for pregnancy exposure  
51  
52 research[3, 22, 23].  
53  
54  
55  
56  
57  
58  
59  
60

## Outcome Ascertainment

Information on neonatal outcomes such as vital status, birth weight, gestational age, and APGAR scores tend to be consistently captured across the cohort. The key findings of the neonatal surface examinations, although often perfunctory, usually result in the recording of notable physical anomalies. Internal anomalies such as cleft palate, hip dysplasias, and cardiac anomalies as well as more subtle dysmorphic features may be missed at the time of the initial neonatal examination. Details of neonatal deaths, and major congenital disorders often require review of inpatient records at the delivery facilities.

PER data are imported daily into the PHDC and linked using patient identifiers, providing a comprehensive electronic clinical record at the level of the individual which is accessible to the attending clinicians. Both systems benefit greatly from this design. The PER allows for validation of the provincial dataset as relates to pregnancy and delivery, and the PHDC is able to identify missing outcomes (often at sites outside the referral axes) or exposures (from electronic pharmacy dispensing) not included in the PER.

## Findings to date

Between 01 September 2016 and 31 August 2021, 31 346 pregnancies were recorded in the PER. To assess robustness of the dataset, we analysed data for a subset of women who attended their first visit to antenatal care between 01 January 2018 and 31 December 2019 (Table 2). Over this two-year period, 14 527 individual pregnancies were recorded in the PER: 9435 and 5092 at the urban and rural site, respectively. Outcomes were determined for 93.4% of pregnancies (n = 13 574). Gestational dating scans were performed in 38.5% (n = 5583) of all enrolees, of whom 60% (n = 3345) were  $\leq 22$  weeks, facilitating more precise gestational dating at birth as well as timing of exposures.



1  
2  
3  
4  
5  
6 Where relevant, we compared rates of key adverse birth outcomes in the PER with official aggregate  
7 routine indicator data for the WC[17, 24-26], derived from register aggregates reported through the  
8 District Health Information System (Table 3).  
9  
10  
11  
12  
13  
14  
15

#### 16 Published and other outputs

17  
18  
19 We conducted an initial baseline assessment comparing clinical records to dispensing data before the  
20 implementation of the PER[15] and recently updated the analysis demonstrating the value of  
21 combining PER and electronic pharmacy data in improving medicine exposure ascertainment[3]. We  
22 are currently investigating the impact of data source on gestational age (Malaba T, manuscript in  
23 preparation) and hypertensive disorders of pregnancy[27]. PER data have contributed to population-  
24 based analyses describing the use and safety of sodium valproate and isoniazid for TB preventive  
25 therapy in pregnancy[28, 29]. In addition, initiation of the PER provided the opportunity to host a  
26 workshop, *Building Teratovigilance Capacity in Africa*, which provided networking and training  
27 opportunities to 60 delegates from sub-Saharan Africa  
28  
29  
30  
31  
32  
33  
34  
35  
36  
37  
38  
39  
40 <https://globalpharmacovigilance.tghn.org/resources/building-teratovigilance-capacity-africa/>.  
41  
42  
43  
44

#### 45 Strengths and Weaknesses

##### 46 47 48 Strengths

49  
50  
51 The integration of the PER within the PHDC greatly increases the completeness of the data. It  
52 facilitates identification of pregnancy outcomes at facilities outside our sentinel referral chains  
53 reducing loss to follow-up. Harmonization and triangulation of two data sources for medicine  
54 exposures (i.e., clinical records and electronic pharmacy records) provides a more robust summary of  
55  
56  
57  
58  
59  
60

1  
2  
3 exposures than either alone[3, 10, 15]. These systems comprise unique infrastructure able to address  
4  
5 clinical and public health concerns in a low-middle income setting.  
6  
7  
8  
9

10  
11 Accurate timing of exposures over the course of pregnancy is crucial to assess potential associations  
12  
13 with adverse pregnancy outcomes. Collecting multiple reference points for gestational age (i.e.,  
14  
15 neonatal record, ultrasound, last menstrual period, symphysis-fundal height) enabled the  
16  
17 development of a hierarchy of methods and the allocation of a confidence score to the reported  
18  
19 gestational age[30-32]. This offers an advantage over insurance claims datasets which are often used  
20  
21 to determine safety information and in which pregnancy and gestational age must be inferred from  
22  
23 clinical coding alone.  
24  
25  
26  
27  
28  
29

30  
31 In line with WHO recommendations[13], all women attending the PER primary care sites are enrolled  
32  
33 and we reflect background rates of important pregnancy parameters similar to what is expected from  
34  
35 national aggregate data. This will be expanded to include background rates for congenital disorders,  
36  
37 data which are lacking in South Africa[33]. This structure also allows for the analysis of multiple current  
38  
39 and potential future exposures and emerging health concerns e.g., novel medicines and vaccines such  
40  
41 as for SARS-CoV-2.  
42  
43  
44  
45  
46  
47

48  
49 From the outset, it was important to avoid a parallel system and support project sustainability. The  
50  
51 PER has been integrated into the existing clinical and clerical routines and uses local electronic health  
52  
53 information platforms. It allows for electronic generation of key monthly indicators at primary care  
54  
55 sites that are otherwise collected by hand.  
56  
57  
58  
59  
60

1  
2  
3 As the cohort expands, capacity to conduct nested studies that facilitate signal detection and signal  
4 verification of potential or suspected teratogens will improve. The collection of individual-level data  
5  
6 in a large prospectively enrolled cohort, representative of both urban and rural WC populations who  
7  
8 use public sector services will support more robust analyses that can better account for confounding  
9  
10 factors in such observational data.  
11  
12  
13  
14  
15  
16  
17

### 18 Weaknesses

19  
20  
21 The PER digitizes clinical data recorded in operational stationery and we cannot control for data quality  
22 nor account for missing data in the source documents. To address this, we have engaged in on-going  
23 training at the sites with an emphasis on drug history taking, medical record-keeping and neonatal  
24 examination offering in-person teaching and video tutorials. Clinical staff have been provided with  
25  
26 Medicine Identification Aids with photographs of common formulations and packaging, and the WHO  
27  
28 Birth Defects atlas[34]. However, misclassification remains a potential risk.  
29  
30  
31  
32  
33  
34  
35  
36  
37

38 Notwithstanding the advantages of the individual-level data available within the PHDC, data are  
39 limited to those that are entered into one of the electronic medical records systems used in the public  
40 sector. In terms of medicine exposures, the PER documents dispensed medication which may not  
41 reflect actual use. In addition, medicines obtained outside of the public sector systems, from private  
42 doctors or over-the-counter from pharmacies are not included unless they are noted in the clinical  
43 records[3]. Similarly, traditional and complementary medicines lack a linked electronic footprint and  
44  
45 are not included.  
46  
47  
48  
49  
50  
51  
52  
53  
54  
55  
56

57 The PER database is parsimonious by design and necessity and we are unable to account for  
58 unmeasured confounders. However, data fields are collected for the entire cohort who are all drawn  
59  
60

1  
2  
3 from the same geographical areas served by the primary care clinics. Additionally, we record limited  
4  
5 data on lifestyle factors relevant in pregnancy (weight gain, exposure to tobacco, alcohol, recreational  
6  
7 drugs) which are lacking from equivalent population datasets based on insurance claims data.  
8  
9

### 10 11 12 13 Collaboration

14  
15  
16 As with the PHDC within which it is located, the PER can address clinical, operational and research  
17  
18 needs, and data access is specific to each. Aggregate reports are available to managers. Data are  
19  
20 anonymised using standard protocols for de-identifying records before they are shared with  
21  
22 researchers who are not directly engaged in the women's clinical care. It is anticipated that such de-  
23  
24 identified individual-level data may be shared as part of the South African National Pregnancy  
25  
26 Registry[35] and with similar PER initiatives regionally or internationally[36]. Data-sharing  
27  
28 commitments are particularly relevant to research of rare events such as congenital disorders[13]. The  
29  
30 PHDC has in-built privacy systems and strict governance structures managing the protection and use  
31  
32 of health data for both service and research purposes and these apply to the PER[14].  
33  
34  
35  
36  
37  
38  
39

### 40 Patient and public involvement

41  
42  
43 The PER is integrated into the data collection and curation services of the Western Cape Government  
44  
45 Department of Health and clinical and other service providers have engaged with the project since its  
46  
47 inception. The data are available to managers as aggregate reports and to contribute to the electronic  
48  
49 clinical records accessible by clinicians. Feedback from users contributes iteratively to optimization of  
50  
51 the PER to improve health outcomes for pregnant women and infants.  
52  
53  
54  
55  
56  
57  
58  
59  
60

## Conclusions

Research on medicine safety in pregnancy requires data on individual pregnancies, mother-infant linkage, medication exposure, gestational age at exposure, and maternal and birth outcomes. Data completeness and robustness continues to improve with on-going training, evolution of routine clinical information systems, and increasing political focus on pregnancy exposures. The cohort is well-placed to detect large signals in pregnancy outcomes as novel maternal exposures are introduced, and to contribute to cohort harmonization for rarer outcomes and address the lack of information on congenital disorders in Africa.

## Ethics approval

The WC PER has been approved by the Faculty of Health Sciences Human Research Ethics Committees of the University of Cape Town (HREC: 749/2015) and Stellenbosch University (N17/04/040, N20/08/084), and the Western Cape Government Health Research Committee.

## Funding

This work was supported by the US National Institutes of Health [R01HD080465, U01AI069911, U01AI069924, K43TW010683], Bill and Melinda Gates Foundation [INV-004508; 1164272; 1191327; INV-004657], the Wellcome Trust [203135/Z/16/Z], the International AIDS Society [2017-518/SLO], the United States Agency for International Development [72067418CA00023] and the US Centers for Disease Control and Prevention [GH001934].

### Acknowledgements

We acknowledge and thank the PER data teams in Cape Town and Worcester, and the clinical and management staff at the facilities. The support and investment of the subdistrict and provincial health management is crucial to maintaining the initiative. We further acknowledge colleagues from the Western Cape Government: Health and the City of Cape Town.

### Author contributions

Conception and design: EK, UM, AB, ALS, MAD, LM

Design and Implementation including data systems: EK, UM, ALS, GP, KF, JE

Data harmonization: AH, FP, JE, AB, MAD, EK

Clinical oversight: GP, MK, CS, NR, SG, AO, KF

Data cleaning & analysis: EK, ALS, UM, KA, AH

All authors critically reviewed the manuscript.

### Conflict of interests

EK, AB, MAD and KA received funding from Viiv Healthcare unrelated to this project.

The authors declare no conflicts of interest.

## References

1. Daw JR, Hanley GE, Greyson DL, Morgan SG. Prescription drug use during pregnancy in developed countries: a systematic review. *Pharmacoepidemiol Drug Saf.* 2011;20(9):895-902.
2. Mohseni M, Azami-Aghdash S, Gareh Sheyklo S, Moosavi A, Nakhaee M, Pournaghi-Azar F, et al. Prevalence and Reasons of Self-Medication in Pregnant Women: A Systematic Review and Meta-Analysis. *Int J Community Based Nurs Midwifery.* 2018;6(4):272-84.
3. van der Hoven J, Allen E, de Waal R, Cois A, Maartens G, Myer L, et al. Antenatal medicine use in South African women: a comparison of three methods of ascertainment. 2021.
4. Zash R, Holmes L, Diseko M, Jacobson DL, Brummel S, Mayondi G, et al. Neural-Tube Defects and Antiretroviral Treatment Regimens in Botswana. *N Engl J Med.* 2019;381(9):827-40.
5. Zash R, Makhema J, Shapiro RL. Neural-Tube Defects with Dolutegravir Treatment from the Time of Conception. *N Engl J Med.* 2018;379(10):979-81.
6. Gupta A, Montepiedra G, Aaron L, Theron G, McCarthy K, Bradford S, et al. Isoniazid Preventive Therapy in HIV-Infected Pregnant and Postpartum Women. *N Engl J Med.* 2019;381(14):1333-46.
7. Bianchi DW, Kaeser L, Cernich AN. Involving Pregnant Individuals in Clinical Research on COVID-19 Vaccines. *JAMA.* 2021;325(11):1041-2.
8. Holmes LB, Wyszynski DF. North American antiepileptic drug pregnancy registry. *Epilepsia.* 2004;45(11):1465.

- 1
- 2
- 3
- 4 9. Scheuerle A, Covington D. Clinical review procedures for the Antiretroviral Pregnancy Registry. *Pharmacoepidemiol Drug Saf.* 2004;13(8):529-36.
- 5
- 6 10. Gelperin K, Hammad H, Leishear K, Bird ST, Taylor L, Hampp C, et al. A systematic review of
- 7 pregnancy exposure registries: examination of protocol-specified pregnancy outcomes, target sample
- 8 size, and comparator selection. *Pharmacoepidemiol Drug Saf.* 2017;26(2):208-14.
- 9 11. Berrueta M, Ciapponi A, Bardach A, Cairoli FR, Castellano FJ, Xiong X, et al. Maternal and
- 10 neonatal data collection systems in low- and middle-income countries for maternal vaccines active
- 11 safety surveillance systems: A scoping review. *BMC Pregnancy Childbirth.* 2021;21(1):217.
- 12 12. Mehta U, Kalk E, Fairlie L, Boulle A, Rees H. Why South Africa urgently needs to support the
- 13 development of pregnancy exposure registries. *S Afr Med J.* 2019;109(5):294-5.
- 14 13. Mehta U, Clerk C, Allen E, Yore M, Sevene E, Singlovic J, et al. Protocol for a drugs exposure
- 15 pregnancy registry for implementation in resource-limited settings. *BMC Pregnancy Childbirth.*
- 16 2012;12:89.
- 17 14. Boulle A, Heekes A, Tiffin N, Smith M, Mutemaringa T, Zinyakatira N, et al. Data Centre Profile:
- 18 The Provincial Health Data Centre of the Western Cape Province, South Africa. *Int J Popul Data Sci.*
- 19 2019;4(2):1143.
- 20 15. Mehta U, Heekes A, Kalk E, Boulle A. Assessing the value of Western Cape Provincial
- 21 Government health administrative data and electronic pharmacy records in ascertaining medicine use
- 22 during pregnancy. *S Afr Med J.* 2018;108(5):439-43.
- 23 16. Okoli GN, Myles P, Murray-Thomas T, Shepherd H, Wong ICK, Edwards D. Use of Primary Care
- 24 Data in Research and Pharmacovigilance: Eight Scenarios Where Prescription Data are Absent. *Drug*
- 25 *Saf.* 2021.
- 26 17. Day C, Gray C, Padayachee T, Cois A. Chapter 20, Health and Related Indicators. *South African*
- 27 *Health Review 2020.* 2020.
- 28 18. South African National Department of Health. Guideline for the Prevention of Mother to Child
- 29 Transmission of Communicable Infections. Pretoria. November 2019.
- 30 19. World Health Organization. WHO recommendations on antenatal care for a positive
- 31 pregnancy experience. Geneva: WHO Library Cataloguing-in-Publication Data; 2016.
- 32 20. Holmes LB, Nasri HZ, Hunt AT, Zash R, Shapiro RL. Limited surface examination to evaluate
- 33 potential teratogens in a resource-limited setting. *Birth Defects Res.* 2021;113(9):702-7.
- 34 21. Bonhoeffer J, Kochhar S, Hirschfeld S, Heath PT, Jones CE, Bauwens J, et al. Global alignment
- 35 of immunization safety assessment in pregnancy - The GAIA project. *Vaccine.* 2016;34(49):5993-7.
- 36 22. Andrade SE, Berard A, Nordeng HME, Wood ME, van Gelder M, Toh S. Administrative Claims
- 37 Data Versus Augmented Pregnancy Data for the Study of Pharmaceutical Treatments in Pregnancy. *Curr Epidemiol Rep.* 2017;4(2):106-16.
- 38 23. Grzeskowiak LE, Gilbert AL, Morrison JL. Investigating outcomes associated with medication
- 39 use during pregnancy: a review of methodological challenges and observational study designs. *Reprod*
- 40 *Toxicol.* 2012;33(3):280-9.
- 41 24. Massyn N, Day C, Ndlovu N, Padayachee T. District Health Barometer 2019/2020. Durban:
- 42 Health Systems Trust; 2020.
- 43 25. National Perinatal Mortality and Morbidity Committee. NPEMMCO Triennial Report 2017 -
- 44 2019. 2017-2019.
- 45 26. Provincial Perinatal Morbidity and Mortality Committee. Western Cape Saving Babies Triennial
- 46 Report 2017 -2019. 2020.
- 47 27. Slogrove A, Davies MA, Williams P, Abrams E, Theron G, Cotton M, et al., editors. Hypertensive
- 48 Disorders in Pregnancy and HIV: A Province-wide Cohort Analysis during 2018 and 2019 in the Western
- 49 Cape, South Africa. 13th International Workshop on HIV Pediatrics; 2021 16-17 July 2021; virtual.
- 50 28. Kalk E, Heekes A, Mehta U, de Waal R, Jacob N, Cohen K, et al. Safety and Effectiveness of
- 51 Isoniazid Preventive Therapy in Pregnant Women Living with Human Immunodeficiency Virus on
- 52 Antiretroviral Therapy: An Observational Study Using Linked Population Data. *Clin Infect Dis.*
- 53 2020;71(8):e351-e8.
- 54
- 55
- 56
- 57
- 58
- 59
- 60



- 1  
2  
3 29. Mehta U, Smith M, Kalk E, Hayes H, Swart A, Tucker L, et al. Understanding and Responding  
4 to Prescribing Patterns of Sodium Valproate-Containing Medicines in Pregnant Women and Women  
5 of Childbearing Age in Western Cape, South Africa. *Drug Saf.* 2021;44(1):41-51.  
6  
7 30. Geerts L, Poggenpoel E, Theron G. A comparison of pregnancy dating methods commonly used  
8 in South Africa: a prospective study. *S Afr Med J.* 2013;103(8):552-6.  
9 31. Malaba TR, Newell ML, Madlala H, Perez A, Gray C, Myer L. Methods of gestational age  
10 assessment influence the observed association between antiretroviral therapy exposure, preterm  
11 delivery, and small-for-gestational age infants: a prospective study in Cape Town, South Africa. *Ann*  
12 *Epidemiol.* 2018;28(12):893-900.  
13 32. Quinn JA, Munoz FM, Gonik B, Frau L, Cutland C, Mallett-Moore T, et al. Preterm birth: Case  
14 definition & guidelines for data collection, analysis, and presentation of immunisation safety data.  
15 *Vaccine.* 2016;34(49):6047-56.  
16 33. Lebeso V, Aldous C, Malherbe HL. South African congenital disorders data, 2006 - 2014. *S Afr*  
17 *Med J.* 2016;106(10):992-5.  
18 34. WHO/CDC/ICBDSR. Birth defects surveillance: atlas of selected congenital anomalies. Geneva:  
19 World Health Organization; 2014.  
20 35. Buhle. U. Understanding Birth Outcomes for Mothers and Infants: Building Healthcare by  
21 Linking Exposures 2021 [Available from: <https://www.ubomibuhle.org.za/>.  
22  
23 36. IeDEA-EA. Measuring Adverse Pregnancy & Newborn Outcomes (MANGO): an IeDEA  
24 Collaboration Study 2021 [Available from: <https://globalhealth.iu.edu/research/iedea-main-page/>]  
25  
26  
27  
28  
29  
30  
31  
32  
33  
34  
35  
36  
37  
38  
39  
40  
41  
42  
43  
44  
45  
46  
47  
48  
49  
50  
51  
52  
53  
54  
55  
56  
57  
58  
59  
60

Table 1. Summary of Data Elements in the PER

| Variables collected                                                                                                                                                                                                                                                                                                                              | Calculated parameters                                                                                                                    | MOU aggregate statistics                                                                                                                                                                                                                              |
|--------------------------------------------------------------------------------------------------------------------------------------------------------------------------------------------------------------------------------------------------------------------------------------------------------------------------------------------------|------------------------------------------------------------------------------------------------------------------------------------------|-------------------------------------------------------------------------------------------------------------------------------------------------------------------------------------------------------------------------------------------------------|
| <i>Antenatal</i><br>Maternal date of birth<br>Date of first antenatal visit<br>Last menstrual period<br>Parity, Gravidity<br>Obstetric & Medical history<br>Chronic medication<br>Height, mid-upper arm circumference, weight, blood pressure, urinalysis<br>Symphysis fundal height<br>Alcohol, tobacco, drug use<br>Number of antenatal visits | Gestational age at first antenatal visit                                                                                                 | Number of first visits<br>Number of women first ANC < 20 weeks<br>Number age < 20 years or > 38 years<br>Number grand multipara ( $\geq 5$ deliveries)<br>Number high blood pressure/proteinuria                                                      |
| <i>Vertical transmission of HIV</i><br>HIV status at first antenatal visit<br>Subsequent positive HIV test<br>HIV treatment incl. regimen switches<br>CD4 count<br>Viral load<br>HIV-exposed infant HIV-PCR                                                                                                                                      | Number of women at high risk of vertical HIV transmission [18]<br>ART in hand at estimated time of conception<br>ART in hand at delivery | Number of women living with HIV:<br>Before pregnancy<br>During pregnancy<br>Number of women on ART (1 <sup>st</sup> & 2 <sup>nd</sup> line):<br>Before, during pregnancy<br>VL unsuppressed at pregnancy & delivery<br>Number of infant birth HIV-PCR |
| <i>Ultrasound</i><br>Gestational age<br>Abnormalities<br>Expected date of delivery                                                                                                                                                                                                                                                               |                                                                                                                                          | Number of ultrasounds conducted<br>Number multiple pregnancies                                                                                                                                                                                        |
| <i>Maternal outcome</i><br>Facility-based death                                                                                                                                                                                                                                                                                                  | Vital status                                                                                                                             | Maternal death                                                                                                                                                                                                                                        |
| <i>Peri-partum</i><br>Date & site of outcome                                                                                                                                                                                                                                                                                                     |                                                                                                                                          | Number of deliveries                                                                                                                                                                                                                                  |

1  
2  
3  
4  
5  
6  
7  
8  
9  
10  
11  
12  
13  
14  
15  
16  
17  
18  
19  
20  
21  
22  
23  
24  
25  
26  
27  
28  
29  
30  
31  
32  
33  
34  
35  
36  
37  
38  
39  
40  
41  
42  
43  
44  
45  
46

|                                                                                                                                                                                         |                                                                                                                          |                                                                                                                      |
|-----------------------------------------------------------------------------------------------------------------------------------------------------------------------------------------|--------------------------------------------------------------------------------------------------------------------------|----------------------------------------------------------------------------------------------------------------------|
| Method of delivery<br>Gestational age at outcome                                                                                                                                        | Prematurity (< 37 completed weeks gestation)                                                                             |                                                                                                                      |
| <i>Pregnancy outcome</i><br>Livebirth<br>Stillbirth<br>Miscarriage<br>Termination of pregnancy<br>Ectopic pregnancy<br>Molar pregnancy                                                  | Gestational age at pregnancy outcome                                                                                     | Number of livebirths, stillbirths, miscarriages                                                                      |
| <i>Neonate</i><br>Date of birth<br>Sex, APGAR scores<br>Gestational age<br>Birth weight, length, head circumference, foot length<br>Neonatal surface examination<br>Abnormalities noted | Gestational age at birth<br>Low birth weight (< 2500g)<br>Prematurity (< 37 completed weeks gestation)<br>Neonatal death | Number of low birth weight infants<br>Number premature infants<br>Number neonatal deaths<br>Perinatal mortality rate |

ANC – antenatal care; ART – antiretroviral therapy; HIV – Human Immune Deficiency Virus; PCR – polymerase chain reaction

Table 2. Maternal and obstetric characteristics of the cohort 2018-2019

| Variable                                       | PER total<br>n = 14 527 | PER urban<br>n = 9435 (65%) | PER rural<br>n = 5092 (35%) |
|------------------------------------------------|-------------------------|-----------------------------|-----------------------------|
| Age (years) median (IQR)                       | 27 (23 – 32)            | 28 (23 – 33)                | 26 (22 – 31)                |
| Living with HIV at pregnancy outcome           | 3931 (27.1)             | 3241 (34.3)                 | 690 (13.6)                  |
| Obstetric ultrasound present n (%)             | 5583 (38.4)             | 4063 (43.1)                 | 1520 (29.9)                 |
| Early ultrasound (i.e. < 22 weeks) n (% of US) | 3345 (59.9)             | 2393 (58.9)                 | 952 (62.6)                  |
| Gestational age at birth (weeks) median (IQR)  | 40 (37 – 40)            | 40 (36 – 40)                | 39 (35 – 40)                |
| Birth weight (grams) median (IQR)              | 3100 (2750 – 3440)      | 3140 (2800 – 3480)          | 2975 (2575 – 3320)          |
| Low birth weight <sup>a</sup> n (%)            | 1736 (12.0)             | 879 (9.3)                   | 857 (16.8)                  |
| Premature birth <sup>b</sup> n(%)              | 2949 (20.3)             | 1735 (18.4)                 | 1214 (23.8)                 |
| Pregnancy outcome n (%)                        |                         |                             |                             |
| Live birth                                     | 12 419 (85.5)           | 1189 (82.3)                 | 4630 (90.9)                 |
| Still birth                                    | 296 (2.0)               | 180 (1.9)                   | 116 (2.3)                   |
| Neonatal death <sup>c</sup>                    | 109 (0.8)               | 71 (0.5)                    | 36 (0.7)                    |
| Miscarriage                                    | 395 (2.7)               | 318 (3.4)                   | 77 (1.5)                    |
| Ectopic pregnancy                              | 82 (0.6)                | 60 (0.6)                    | 22 (0.4)                    |
| Termination of pregnancy                       | 273 (1.9)               | 223 (2.4)                   | 50 (1.0)                    |
| Unknown                                        | 953 (6.6)               | 792 (8.4)                   | 161 (3.1)                   |
| Delivery method <sup>d</sup> n(%)              |                         |                             |                             |
| Born before arrival at birthing facility       | 608 (4.7)               | 245 (3.1)                   | 363 (7.6)                   |
| Vaginal delivery                               | 7587 (59.2)             | 4655 (57.9)                 | 2932 (61.3)                 |
| Assisted delivery <sup>e</sup>                 | 140 (1.1)               | 51 (0.6)                    | 89 (1.9)                    |
| Caesarean section                              | 3416 (26.6)             | 2411 (30.0)                 | 1005 (21.0)                 |
| Unknown                                        | 1073 (8.4)              | 680 (8.5)                   | 393 (8.2)                   |
| Infant outcome <sup>d</sup> n(%)               |                         |                             |                             |
| Stillborn                                      | 296 (2.3)               | 180 (2.2)                   | 116 (2.4)                   |
| Early neonatal death <sup>c</sup>              | 80 (0.6)                | 55 (0.7)                    | 25 (0.5)                    |
| Late neonatal death                            | 29 (0.2)                | 18 (0.2)                    | 11 (0.2)                    |
| Alive                                          | 12 419 (96.8)           | 7798 (96.9)                 | 4630 (96.8)                 |
| Tobacco use <sup>f</sup> n(%)                  |                         |                             |                             |
| Current user                                   | 1297 (8.9)              | 87 (0.9)                    | 1210 (23.8)                 |
| Past user                                      | 55 (0.4)                | 13 (0.1)                    | 42 (0.8)                    |
| Never user                                     | 9997 (68.8)             | 7222 (76.5)                 | 2775 (54.5)                 |
| Not reported                                   | 3178 (21.9)             | 2113 (14.5)                 | 1065 (7.3)                  |
| Alcohol use <sup>f</sup> n(%)                  |                         |                             |                             |
| Current user                                   | 588 (4.1)               | 339 (3.6)                   | 249 (4.9)                   |
| Past user                                      | 167 (1.2)               | 66 (0.7)                    | 101 (2.0)                   |
| Never user                                     | 10 570 (72/8)           | 6885 (73.0)                 | 3685 (72.4)                 |
| Not reported                                   | 3202 (22.0)             | 2145 (14.8)                 | 1057 (7.3)                  |

<sup>a</sup> birthweight<2500g; liveborn infants only

<sup>b</sup> birth < 37 completed weeks gestation; liveborn infants only

1  
2  
3     <sup>c</sup> neonatal death: death before 28 days of life; early neonatal death: death before 7 days of  
4     life; late neonatal death: death between 8 and 28 days of life  
5  
6     <sup>d</sup> viable pregnancies (i.e. >27 weeks gestation(17)) (n=12 824)  
7     <sup>e</sup> forceps or vacuum delivery  
8     <sup>f</sup> reported at first antenatal visit  
9

10  
11  
12  
13  
14  
15  
16  
17  
18  
19  
20  
21  
22  
23  
24  
25  
26  
27  
28  
29  
30  
31  
32  
33  
34  
35  
36  
37  
38  
39  
40  
41  
42  
43  
44  
45  
46  
47  
48  
49  
50  
51  
52  
53  
54  
55  
56  
57  
58  
59  
60

For peer review only

Table 3. Comparison between PER reported or calculated PER outcomes and aggregate indicators in formal provincial information systems

| Indicator                                                            | PER total<br>n = 14 527 | PER urban<br>n = 9435 (65%) | PER rural<br>n = 5092 (35%) | Reported aggregate for<br>the Western Cape 2017<br>- 2019 <sup>a</sup> |
|----------------------------------------------------------------------|-------------------------|-----------------------------|-----------------------------|------------------------------------------------------------------------|
| Still birth <sup>b</sup> n (%)                                       | 296 (2.0)               | 180 (1.9)                   | 116 (2.4)                   | 2.2% <sup>26</sup>                                                     |
| Per 1000 births                                                      | 20.0                    | 19.1                        | 24.0                        | 18.5 <sup>17</sup><br>22.1 <sup>25,26</sup>                            |
| Neonatal death in facility<br>rate <sup>c</sup> per 1000 live births | 8.7                     | 9.2                         | 7.7                         | 8.9 <sup>17,25</sup>                                                   |
| Perinatal mortality rate <sup>d</sup><br>per 1000 births             | 29                      | 29                          | 29                          | 25.6 <sup>17</sup><br>27.9 <sup>25</sup><br>29.1 <sup>26</sup>         |
| Low birth weight <sup>e</sup> n(%)                                   | 1737 (12.0)             | 879 (9.3)                   | 857 (16.8)                  | 14.9% urban subdistrict<br>18.4% rural subdistrict <sup>26</sup>       |
| Maternal mortality in facility<br>ratio per 100 000 live births      |                         | 63.5                        | Insufficient<br>data        | 43.6 – 66.8 <sup>25</sup>                                              |
| Teenage pregnancies (10 –<br>19 years) n(%)                          | 929 (6.4)               | 450 (4.8)                   | 497 (9.4)                   | 3.5% urban subdistrict<br>7.3% rural subdistrict <sup>26</sup>         |
| Caesarean section rate per<br>1000 births                            | 3416 (26.6)             | 2411 (30.0)                 | 1005 (21.0)                 | 28.9 <sup>25</sup> - 29.3 <sup>26</sup>                                |

<sup>a</sup> includes aggregate reports compiled from the District Health Information System and Perinatal Problem Identification Programme<sup>17, 25-26</sup>

<sup>b</sup> delivery of a baby with no signs of life after 27 completed weeks of gestation (i.e., viable baby born dead)

<sup>c</sup> death before 28 days of life

<sup>d</sup> still birth plus neonatal deaths <8 days per 1000 births

<sup>e</sup> birthweight<2500g; liveborn infants only

# BMJ Open

## Cohort Profile: The Western Cape Pregnancy Exposure Registry (WCPER)

|                               |                                                                                                                                                                                                                                                                                                                                                                                                                                                                                                                                                                                                                                                                                                                                                                                                                                                                                                                                                                                                                                                                                                                                                                                                                                                                                                                                                                                                                                                                                                                                                                                                                                                                                                                                                                                                                                                                                                                                                                                                                                                                                                                                                                                                                                                                                                                                                                                                                                                                                                                                                                                                                    |
|-------------------------------|--------------------------------------------------------------------------------------------------------------------------------------------------------------------------------------------------------------------------------------------------------------------------------------------------------------------------------------------------------------------------------------------------------------------------------------------------------------------------------------------------------------------------------------------------------------------------------------------------------------------------------------------------------------------------------------------------------------------------------------------------------------------------------------------------------------------------------------------------------------------------------------------------------------------------------------------------------------------------------------------------------------------------------------------------------------------------------------------------------------------------------------------------------------------------------------------------------------------------------------------------------------------------------------------------------------------------------------------------------------------------------------------------------------------------------------------------------------------------------------------------------------------------------------------------------------------------------------------------------------------------------------------------------------------------------------------------------------------------------------------------------------------------------------------------------------------------------------------------------------------------------------------------------------------------------------------------------------------------------------------------------------------------------------------------------------------------------------------------------------------------------------------------------------------------------------------------------------------------------------------------------------------------------------------------------------------------------------------------------------------------------------------------------------------------------------------------------------------------------------------------------------------------------------------------------------------------------------------------------------------|
| Journal:                      | <i>BMJ Open</i>                                                                                                                                                                                                                                                                                                                                                                                                                                                                                                                                                                                                                                                                                                                                                                                                                                                                                                                                                                                                                                                                                                                                                                                                                                                                                                                                                                                                                                                                                                                                                                                                                                                                                                                                                                                                                                                                                                                                                                                                                                                                                                                                                                                                                                                                                                                                                                                                                                                                                                                                                                                                    |
| Manuscript ID                 | bmjopen-2021-060205.R1                                                                                                                                                                                                                                                                                                                                                                                                                                                                                                                                                                                                                                                                                                                                                                                                                                                                                                                                                                                                                                                                                                                                                                                                                                                                                                                                                                                                                                                                                                                                                                                                                                                                                                                                                                                                                                                                                                                                                                                                                                                                                                                                                                                                                                                                                                                                                                                                                                                                                                                                                                                             |
| Article Type:                 | Cohort profile                                                                                                                                                                                                                                                                                                                                                                                                                                                                                                                                                                                                                                                                                                                                                                                                                                                                                                                                                                                                                                                                                                                                                                                                                                                                                                                                                                                                                                                                                                                                                                                                                                                                                                                                                                                                                                                                                                                                                                                                                                                                                                                                                                                                                                                                                                                                                                                                                                                                                                                                                                                                     |
| Date Submitted by the Author: | 23-Mar-2022                                                                                                                                                                                                                                                                                                                                                                                                                                                                                                                                                                                                                                                                                                                                                                                                                                                                                                                                                                                                                                                                                                                                                                                                                                                                                                                                                                                                                                                                                                                                                                                                                                                                                                                                                                                                                                                                                                                                                                                                                                                                                                                                                                                                                                                                                                                                                                                                                                                                                                                                                                                                        |
| Complete List of Authors:     | <p>Kalk, Emma; University of Cape Town Faculty of Health Sciences, Centre for Infectious Disease Epidemiology &amp; Research</p> <p>Heekes, Alexa; University of Cape Town Faculty of Health Sciences, Centre for Infectious Disease Epidemiology &amp; Research; Western Cape Department of Health, Health Intelligence Directorate</p> <p>Slogrove, Amy; Stellenbosch University, Ukwanda Centre for Rural Health, Department of Global Health; Stellenbosch University, Department of Paediatrics &amp; Child Health</p> <p>Phelanyane, Florence; University of Cape Town Faculty of Health Sciences, Centre for Infectious Disease Epidemiology &amp; Research; Western Cape Department of Health, Health Intelligence Directorate</p> <p>Davies, Mary-Ann; University of Cape Town Faculty of Health Sciences, Centre for Infectious Disease Epidemiology &amp; Research; Western Cape Department of Health, Health Intelligence Directorate</p> <p>Myer, Landon; University of Cape Town Faculty of Health Sciences, Division of Epidemiology &amp; Biostatistics</p> <p>Euvrard, Jonathan; University of Cape Town Faculty of Health Sciences, Centre for Infectious Disease Epidemiology &amp; Research; Western Cape Department of Health, Health Intelligence Directorate</p> <p>Kroon, Max; University of Cape Town Faculty of Health Sciences, Neonatology; Mowbray Maternity Hospital, Neonatal Services</p> <p>Petro, Greg; University of Cape Town Faculty of Health Sciences, Department of Obstetrics &amp; Gynaecology; New Somerset Hospital, Maternity Services</p> <p>Fieggen, Karen; University of Cape Town Faculty of Health Sciences, Division of Human Genetics; Groote Schuur Hospital, Medical Genetics Services</p> <p>Stewart, Chantal; University of Cape Town Faculty of Health Sciences, Department of Obstetrics &amp; Gynaecology; Mowbray Maternity Hospital, Maternity Services</p> <p>Rhoda, Natasha; University of Cape Town Faculty of Health Sciences, Department of Paediatrics and Child Health; Mowbray Maternity Hospital, Neonatal Services</p> <p>Gebhardt, Stefan; Stellenbosch University, Department of Obstetrics &amp; Gynaecology; Tygerberg Hospital, Maternity Services</p> <p>Osman, Ayesha; University of Cape Town Faculty of Health Sciences, Department of Obstetrics &amp; Gynaecology; Groote Schuur Hospital, Maternity Services</p> <p>Anderson, Kim; University of Cape Town Faculty of Health Sciences, Centre for Infectious Disease Epidemiology &amp; Research</p> <p>Boulle, Andrew; University of Cape Town Faculty of Health Sciences,</p> |

|                                  |                                                                                                                                                                                                                                                      |
|----------------------------------|------------------------------------------------------------------------------------------------------------------------------------------------------------------------------------------------------------------------------------------------------|
|                                  | Centre for Infectious Disease Epidemiology & Research; Western Cape Department of Health, Health Intelligence Directorate<br>Mehta, Ushma; University of Cape Town Faculty of Health Sciences, Centre for Infectious Disease Epidemiology & Research |
| <b>Primary Subject Heading</b> : | Public health                                                                                                                                                                                                                                        |
| Secondary Subject Heading:       | Epidemiology, Health services research, Obstetrics and gynaecology, Pharmacology and therapeutics, Public health                                                                                                                                     |
| Keywords:                        | PUBLIC HEALTH, EPIDEMIOLOGY, Maternal medicine < OBSTETRICS, Fetal medicine < OBSTETRICS                                                                                                                                                             |
|                                  |                                                                                                                                                                                                                                                      |

SCHOLARONE™  
Manuscripts





I, the Submitting Author has the right to grant and does grant on behalf of all authors of the Work (as defined in the below author licence), an exclusive licence and/or a non-exclusive licence for contributions from authors who are: i) UK Crown employees; ii) where BMJ has agreed a CC-BY licence shall apply, and/or iii) in accordance with the terms applicable for US Federal Government officers or employees acting as part of their official duties; on a worldwide, perpetual, irrevocable, royalty-free basis to BMJ Publishing Group Ltd ("BMJ") its licensees and where the relevant Journal is co-owned by BMJ to the co-owners of the Journal, to publish the Work in this journal and any other BMJ products and to exploit all rights, as set out in our [licence](#).

The Submitting Author accepts and understands that any supply made under these terms is made by BMJ to the Submitting Author unless you are acting as an employee on behalf of your employer or a postgraduate student of an affiliated institution which is paying any applicable article publishing charge ("APC") for Open Access articles. Where the Submitting Author wishes to make the Work available on an Open Access basis (and intends to pay the relevant APC), the terms of reuse of such Open Access shall be governed by a Creative Commons licence – details of these licences and which [Creative Commons](#) licence will apply to this Work are set out in our licence referred to above.

Other than as permitted in any relevant BMJ Author's Self Archiving Policies, I confirm this Work has not been accepted for publication elsewhere, is not being considered for publication elsewhere and does not duplicate material already published. I confirm all authors consent to publication of this Work and authorise the granting of this licence.

1  
2  
3 *Cohort Profile: The Western Cape Pregnancy Exposure Registry (WCPER)*  
4  
5

6 Authors: Emma Kalk<sup>1\*</sup>, Alexa Heekes<sup>1,2</sup>, Amy Slogrove<sup>3,4</sup>, Florence Phelanyane<sup>1,2</sup>, Mary-Ann Davies<sup>1,2</sup>,  
7  
8 Landon Myer<sup>5</sup>, Jonathan Euvrard<sup>1,2</sup>, Max Kroon<sup>6,7</sup>, Greg Petro<sup>8,9</sup>, Karen Fieggen<sup>10,11</sup>, Chantal Stewart<sup>8,12</sup>,  
9  
10 Natasha Rhoda<sup>6,7</sup>, Stefan Gebhardt<sup>13,14</sup>, Ayesha Osman<sup>8,15</sup>, Kim Anderson<sup>1</sup>, Andrew Boulle<sup>1,2†</sup>, Ushma  
11  
12 Mehta<sup>1†</sup>  
13  
14

15  
16 1. Centre for Infectious Disease Epidemiology & Research and Division of Public Health Medicine,  
17  
18 School of Public Health & Family Medicine, University of Cape Town, South Africa  
19

20  
21 2. Health Intelligence Directorate, Western Cape Government Health, Cape Town, South Africa  
22

23  
24 3. Department of Paediatrics & Child Health, Faculty of Medicine & Health Sciences, Stellenbosch  
25  
26 University, Worcester, South Africa  
27

28  
29 4. Ukwanda Centre for Rural Health, Department of Global Health, Faculty of Medicine & Health  
30  
31 Sciences, Stellenbosch University, Worcester, South Africa  
32

33  
34 5. Division of Epidemiology & Biostatistics, School of Public Health & Family Medicine, University of  
35  
36 Cape Town, South Africa  
37

38  
39 6. Department of Paediatrics and Child Health, University of Cape Town, South Africa  
40

41  
42 7. Mowbray Maternity Hospital, Neonatal Services, Cape Town, South Africa  
43

44  
45 8. Department of Obstetrics & Gynaecology, University of Cape Town, South Africa  
46

47  
48 9. New Somerset Hospital, Maternity Services, Cape Town, South Africa  
49

50  
51 10. Division of Human Genetics, University of Cape Town, Cape Town, South Africa  
52

53  
54 11. Groote Schuur Hospital, Medical Genetics Service, Cape Town, South Africa  
55

56  
57 12. Mowbray Maternity Hospital, Maternity Services, Cape Town, South Africa  
58

59  
60 13. Department of Obstetrics & Gynaecology, Stellenbosch University, Cape Town, South Africa

1  
2  
3 14. Tygerberg Hospital Maternity Services, Cape Town, South Africa  
4  
5

6 15. Groote Schuur Hospital, Maternity Services, Cape Town South Africa  
7  
8  
9

10  
11  
12 \*corresponding author: Centre for Infectious Disease Epidemiology & Research, School of Public

13  
14 Health & Family Medicine, 5<sup>th</sup> floor Falmouth Building, University of Cape Town Faculty of Health

15  
16 Sciences, Anzio Road, Observatory, Cape Town  
17

18  
19 [emma.kalk@uct.ac.za](mailto:emma.kalk@uct.ac.za)  
20  
21

22 † Joint senior authors  
23  
24  
25  
26  
27  
28  
29  
30  
31  
32  
33  
34  
35  
36  
37  
38  
39  
40  
41  
42  
43  
44  
45  
46  
47  
48  
49  
50  
51  
52  
53  
54  
55  
56  
57  
58  
59  
60

## ABSTRACT

Purpose: The Western Cape Pregnancy Exposure Registry (PER) was established at two public sector healthcare sentinel sites in the Western Cape province, South Africa to provide on-going surveillance of drug exposures in pregnancy and associations with pregnancy outcomes.

Participants: Established in 2016, all women attending their first antenatal visit at primary care obstetric facilities were enrolled and followed to pregnancy outcome regardless of the site (i.e., primary, secondary, tertiary facility). Routine operational obstetric and medical data are digitized from the clinical stationery at the health care facilities. Data collection has been integrated into existing services and information platforms and supports routine operations. The PER is situated within the Provincial Health Data Centre, an information exchange that harmonizes and consolidates all health-related electronic data in the province. Data are contributed via linkage across a unique identifier. This relationship limits the missing data in the PER, allows validation and avoids misclassification in the population-level dataset.

Findings to date: Approximately 5000 and 3500 pregnant women enter the dataset annually at the urban and rural sites, respectively. As of August 2021, >30 000 pregnancies have been recorded and outcomes have been determined for 93%. Analysis of key obstetric and neonatal health indicators derived from the PER are consistent with the aggregate data in the District Health Information System.

Future plans: This represents significant infrastructure, able to address clinical and epidemiological concerns in a low/middle-income setting.

### Key words

Pregnancy Exposure Registry, Pharmacovigilance, Surveillance

### Strengths and Limitations of this Study

The Western Cape Pregnancy Exposure Registry (PER) provides on-going surveillance of drug exposures in pregnancy and associations with pregnancy outcomes.

Data collection is integrated into existing services and information platforms and supports routine operations.

The PER is situated within the Provincial Health Data Centre, an information exchange that harmonizes and consolidates all health-related electronic data which limits missing data, allows validation and avoids misclassification in the population-level dataset.

The PER digitizes clinical data recorded in operational stationery and we cannot control for data quality nor account for missing data in the source documents nor for unmeasured confounders.

Medicines obtained outside the public sector systems and traditional and complementary medicines are not included unless they are documented in the clinical stationery.

## *Cohort Profile: The Western Cape Pregnancy Exposure Registry*

### Introduction

Assessing medicine and vaccine safety in pregnancy requires on-going surveillance across multiple settings. In high-income countries, reviews of outpatient prescriptions and self-medication during pregnancy estimated exposure rates of up to 93% and 43%, respectively, excluding vitamins and supplements[1, 2]. Reports from Africa, the site of mass prevention and treatment campaigns for HIV, tuberculosis and malaria, are less frequent: we estimate that 79% - 99% of women in Cape Town use medicines antenatally[3].

Pregnant women have been systematically excluded from pharmaceutical trials and the efficacy, dosing and safety of many medicines used during pregnancy are uncertain or findings delayed until after the product is licensed and in use. Post-authorization safety assessments have traditionally relied on passive reporting of suspected medicine-related adverse events. Such systems have been limited by their dependence on voluntary reporting, variable data quality, absence of background rates of adverse birth outcomes including common congenital disorders, and lack of data to establish a denominator.

Recently, pharmacovigilance in pregnancy has drawn public and political attention following concerns about the initial association observed between the antiretroviral integrase inhibitor, dolutegavir, and neural tube defects[4, 5], the potential risk of isoniazid preventive therapy in women living with HIV[6] (WLHIV), and SARS-CoV-2 vaccines[7]. With all these exposures, synthesis and meta-analysis of the available data has been re-assuring and the World Health Organization (WHO) guidelines report no contra-indication to their use in pregnant and breast-feeding women [8-10]. In addition, there have

1  
2  
3 been increased calls globally for the inclusion of pregnant women in clinical trials for new therapeutic  
4 and preventive agents, particularly in the field of infectious disease[11-14].  
5  
6  
7  
8  
9

10  
11 Pregnancy Exposure Registries (PER) are a form of surveillance, designed to iteratively detect adverse  
12 events within a defined pregnant population. Importantly, the prospective nature of PER allows  
13 collection of exposure and other data before the pregnancy outcome is known. The pharmaceutical  
14 industry maintains drug-specific registries for medicines and/or drug classes with known/suspected  
15 teratogenic effects or as part of post-marketing commitments; e.g., the Antiretroviral Pregnancy and  
16 Anti-Epileptic Drug Registries[15, 16]. In addition, teratology information services may collect data on  
17 pregnancy exposures. These PER depend on voluntary enrolment by clinicians and/or women, and  
18 many do not directly collect data from comparator groups but rely either on internal comparators or  
19 on an identified external comparator to provide background prevalence data[17]. Background rates  
20 of adverse maternal and obstetric outcomes are necessary to determine deviations from expected  
21 proportions (signals). Such data may be limited or lacking in low- and middle-income countries[18, 19]  
22 or differ sufficiently from the source population so as to introduce bias (e.g., use of the Metropolitan  
23 Atlanta Congenital Defects Program as external comparator for USA-based studies[17].)  
24  
25  
26  
27  
28  
29  
30  
31  
32  
33  
34  
35  
36  
37  
38  
39  
40  
41  
42  
43

44 The UNICEF/UNDP/World Bank/WHO Special Programme for Research & Training in Tropical Diseases  
45 (TDR) has developed a PER approach for resource-limited settings aimed at prospective data collection  
46 on exposures in a cohort of pregnant women attending antenatal care services at sentinel sites.  
47 Important for validity and causality determination, the approach recommends inclusion of *all* women  
48 presenting to the site to allow concurrent establishment of background rates and assessment of  
49 multiple potential exposures[20].  
50  
51  
52  
53  
54  
55  
56  
57  
58  
59  
60

1  
2  
3 The Western Cape (WC) PER was established in Cape Town in 2016, adapted from the TDR template.  
4  
5 It was nested within the province-wide health information exchange, a component within a larger  
6  
7 project designed to assess the impact of WHO Option B+ for vertical HIV transmission prevention (i.e.,  
8  
9 universal lifelong antiretroviral therapy [ART] for pregnant and breast-feeding women) at the  
10  
11 population and individual levels[21]. Situating the PER within the linked information exchange avoided  
12  
13 some of the limitations of exclusive primary-care databases in that both electronic inpatient and  
14  
15 outpatient prescriptions are recorded as well as those from specialist and other off-site clinics, sources  
16  
17 which may be absent from primary-care records[3, 22, 23]. The design also supports augmentation of  
18  
19 the electronic clinical record for enrolled women, while providing a more secure, sustainable, and  
20  
21 ethically-viable platform for capturing clinical data on mothers and infants.  
22  
23  
24  
25  
26  
27  
28

29 We took a pragmatic approach to the establishment of the PER based on the availability of resources  
30  
31 and the desire to integrate into existing systems and operational routines, avoiding a parallel  
32  
33 infrastructure and supporting longevity. Data generated by the initiative are available for the  
34  
35 evaluation and improvement of clinical care as well as epidemiological review.  
36  
37  
38  
39  
40  
41

#### 42 Cohort description

43  
44 The PER has been established at two sentinel sites in the WC. Gugulethu Midwife Obstetric Unit  
45  
46 (GMOU) provides obstetric care to approximately 5000 women annually in Gugulethu, Cape Town a  
47  
48 low-income area with high unemployment and an antenatal HIV prevalence of approximately 30%.  
49  
50 GMOU refers patients to Mowbray Maternity (secondary) and Groote Schuur (tertiary) Hospitals.  
51  
52 About half of all women who attend GMOU are referred to hospital, antenatally or perinatally.  
53  
54 Worcester MOU (WMOU) is situated adjacent to the Worcester Provincial Hospital in Worcester, a  
55  
56 town of approximately 230 000 in a farming community 120 kilometers outside Cape Town. WMOU  
57  
58  
59  
60



1  
2  
3 provides delivery services for ~3600 women annually. The antenatal HIV prevalence is approximately  
4  
5 16%. Women requiring more advanced care are referred to Worcester (secondary) and Tygerberg  
6  
7 (tertiary) Hospitals. The community is structurally disadvantaged, and many depend on seasonal  
8  
9 employment on farms. In both areas the population is mobile; women move within the WC province  
10  
11 and may deliver outside the proscribed referral axes.  
12  
13  
14  
15  
16  
17

18 Enrolment started at GMOU in Cape Town in September 2016 and at WMOU in January 2018.  
19  
20  
21  
22  
23

24 All women seeking care at the sentinel primary-care sites were included. Most women who use public  
25  
26 maternity services, including those with medical and obstetric complications, initially present to  
27  
28 primary care, therefore **situating enrolment at the primary-care facility allowed us to capture a**  
29  
30 **sample representative of the pregnant population in the geographic drainage area of that facility.**  
31  
32  
33  
34  
35

36 Maternal and Child Health Services in the Western Cape  
37  
38

39 Obstetric care is free at the point of service and approximately 65% of women present at/before 20  
40  
41 weeks gestation[24]. Antenatal care for uncomplicated pregnancies is provided at Basic Antenatal  
42  
43 Clinics and MOUs, the latter able to manage uncomplicated vaginal deliveries. At any stage during  
44  
45 pregnancy or peri-partum women can be referred to district, regional or tertiary hospitals according  
46  
47 to standard operating procedures. HIV testing is routine at timepoints throughout gestation and  
48  
49 WLHIV are initiated/re-initiated on ART[25]; those already receiving ART may transfer their HIV care  
50  
51 to the MOU. Clients with other underlying medical conditions (e.g., pre-existing hypertension,  
52  
53 diabetes mellitus, cardiac conditions) and/or who develop pregnancy-related medical conditions (e.g.,  
54  
55 hypertensive disorders of pregnancy, gestational diabetes) continue antenatal care at hospital. The  
56  
57 MOU dispenses ART and antenatal supplements and preventive therapies recommended by the WHO  
58  
59  
60

1  
2  
3 in pregnancy (i.e. iron and folate supplements, tetanus and influenza vaccines)[26]. Midwives treat  
4 the common complaints of pregnancy (heartburn, nausea), urinary tract infection, vaginal candidiasis  
5 and provide syndromic treatment for sexually transmitted infections (STI). Frequently, these  
6 medicines are dispensed directly from *ward-stock* without a linked digital record, although details are  
7 recorded in paper-based registers.  
8  
9  
10  
11  
12  
13  
14  
15  
16  
17

18 Within resource constraints, the WC endeavors to provide an antenatal ultrasound scan to clients  
19 before 22 weeks gestation for determining gestational age. If concerns are identified women are up-  
20 referred for formal fetal anomaly review.  
21  
22  
23  
24  
25  
26  
27

28 Antenatal visits, HIV testing, transfers and deliveries are recorded against patient names in individual  
29 paper-based registers. Monthly aggregate statistics of key obstetric indicators (Table 1) are manually  
30 counted from these registers and submitted centrally as part of the routine District Health Information  
31 System platform.  
32  
33  
34  
35  
36  
37  
38  
39  
40

#### 41 Follow-up

42  
43 The Maternity Case Record (MCR) is a patient-held paper-based document distributed at the first  
44 antenatal visit that serves as a record of all clinical obstetric care until discharge after pregnancy  
45 outcome, regardless of level of care. It is utilized throughout South Africa and archived at the site of  
46 outcome. Chronic medication and any agents dispensed during pregnancy should be recorded in the  
47 MCR by the attending clinicians. However, medicines received at specialist clinics, during hospital  
48 admissions and over-the-counter medicines are often not documented [3, 22].  
49  
50  
51  
52  
53  
54  
55  
56  
57  
58  
59  
60

1  
2  
3 After birth, live- and still-born neonates are examined by the attending clinician (nurse  
4 midwife/doctor) and the outcome of the limited neonatal surface examination is recorded in the MCR.  
5  
6 This examination has been shown to detect most major congenital malformations in neonates, i.e.  
7 those that are visible and do not require diagnostic tools[27]. At GMOU, a clinician employed by the  
8 PER performs a review of clinical records to obtain additional data for congenital disorders and  
9 stillbirths. In the case of stillbirth, the placenta may be sent for histological examination.  
10  
11  
12  
13  
14  
15  
16  
17  
18  
19

20 In the WC, most women (99%) give birth at a health facility[24]. Those who do not, will bring their  
21 infants to the MOU soon after birth for review and registration.  
22  
23  
24  
25  
26  
27

28 **For the purposes of the PER, the MCR serves as the primary source of prospectively-collected clinical**  
29 **data.** Thus, women enter the cohort on first visit to the MOU and are followed up until pregnancy  
30 outcome.  
31  
32  
33  
34  
35  
36  
37

#### 38 Data collection

39  
40  
41 The PER digitizes routinely-collected data from the clinical stationery if not already digitized under  
42 existing service delivery. In addition to the patient-held MCR, data sources include primary-care dating  
43 ultrasound reports, and the STI and labour ward delivery registers. As we are using operational data,  
44 definitions have been aligned with operational clinical definitions in the WC. Using other routinely  
45 collected data elements (gestational age, neonate anthropometry) we are able to align case  
46 definitions with those of the Global Alignment of Immunization Safety Assessment in Pregnancy[28],  
47 allowing for harmonization of data and meaningful comparisons with equivalent datasets.  
48 Additionally, we collect or calculate health indicators for the routine monthly aggregate reports  
49 required by the MOUs (Table 1).  
50  
51  
52  
53  
54  
55  
56  
57  
58  
59  
60

1  
2  
3 Externally-funded PER data clerks are embedded at the facilities and project-augmented data  
4 collection is accommodated within the routine patient and document flow without disruption of  
5  
6 clinical care.  
7  
8  
9

10  
11  
12  
13 The provincial government of the WC operates as a single provider of public sector health services. A  
14  
15 9-digit numeric folder number which is common across the health platform for a given patient  
16 facilitates the harmonization of all electronic health records within the Provincial Health Data Centre  
17  
18 (PHDC), the information exchange that consolidates all electronic administrative, pharmacy,  
19  
20 laboratory, and disease-specific information[21]. PER data are recorded against this identifier and  
21  
22 contribute to the PHDC.  
23  
24  
25  
26  
27  
28  
29

30 All MOUs use the Primary Health Care Information Service (PHCIS) electronic medical records system  
31  
32 which records attendance against patient identifiers, and ART in WLHIV. PHCIS automatically  
33  
34 generates a unique folder number for live infants at birth, providing electronic linkage between  
35  
36 mother and baby. Clinicom performs this function at all hospitals. Data are imported daily by the  
37  
38 PHDC[21].  
39  
40  
41  
42  
43  
44

#### 45 Completeness of Medicine Exposure data

46  
47

48 Electronic dispensing data in the PHDC is augmented by the PER which captures medicine exposures  
49  
50 elicited from the women during the clinical consultation and ward-stock medicines recorded by  
51  
52 clinicians in the MCR. The PER also records some lifestyle factors (weight gain, alcohol, tobacco,  
53  
54 recreational drugs) that may act as confounders for certain outcomes. Combining the electronic  
55  
56 pharmacy data in the PHDC strengthens the ascertainment of exposures, providing a complete list of  
57  
58 medication dispensed from public sector pharmacies. Using multiple data sources for this has been  
59  
60

1  
2  
3 shown to provide a more complete picture of antenatal medicine use essential for pregnancy exposure  
4  
5 research[3, 29, 30].  
6  
7  
8  
9

## 10 Outcome Ascertainment

11  
12 Information on neonatal outcomes such as vital status, birth weight, gestational age, and APGAR  
13  
14 scores tend to be consistently captured across the cohort. The key findings of the neonatal surface  
15  
16 examinations, although often perfunctory, usually result in the recording of notable physical  
17  
18 anomalies. Internal anomalies such as cleft palate, hip dysplasias, and cardiac anomalies as well as  
19  
20 more subtle dysmorphic features may be missed at the time of the initial neonatal examination.  
21  
22 Details of neonatal deaths, and major congenital disorders often require review of inpatient records  
23  
24 at the delivery facilities.  
25  
26  
27  
28  
29  
30  
31  
32

33 PER data are imported daily into the PHDC and linked using patient identifiers, providing a  
34  
35 comprehensive electronic clinical record at the level of the individual which is accessible to the  
36  
37 attending clinicians. Both systems benefit greatly from this design. The PER allows for validation of  
38  
39 the provincial dataset as relates to pregnancy and delivery, and the PHDC is able to identify missing  
40  
41 outcomes (often at sites outside the referral axes) or exposures (from electronic pharmacy dispensing)  
42  
43 not included in the PER.  
44  
45  
46  
47  
48  
49

## 50 Findings to date

51  
52  
53 Between 01 September 2016 and 31 August 2021, 31 346 pregnancies were recorded in the PER. To  
54  
55 assess robustness of the dataset, we analysed data for a subset of women who attended their first  
56  
57 visit to antenatal care between 01 January 2018 and 31 December 2019 (Table 2). Over this two-year  
58  
59 period, 14 527 individual pregnancies were recorded in the PER: 9435 and 5092 at the urban and rural  
60

1  
2  
3 site, respectively. Outcomes were determined for 93.4% of pregnancies (n = 13 574). Gestational  
4  
5 dating scans were performed in 38.5% (n = 5583) of all enrolees, of whom 60% (n = 3345) were  $\leq 22$   
6  
7 weeks, facilitating more precise gestational dating at birth as well as timing of exposures. Overall,  
8  
9 1287 women (9%) were exposed to a potentially unsafe medicine over the course of their pregnancies  
10  
11 (Table 3 and Supplementary Table 1).  
12  
13  
14  
15  
16  
17

18 Where relevant, we compared rates of key adverse birth outcomes in the PER with official aggregate  
19  
20 routine indicator data for the WC[24, 31-33], derived from register aggregates reported through the  
21  
22 District Health Information System (Table 3). At the urban site, 38 congenital disorders were confirmed  
23  
24 in 2018 – 2019 (Table 4). Twelve were classified as minor (pre-axial polydactyly, undescended testes,  
25  
26 subglottic stenosis not requiring intervention). Major congenital disorders included two cases of fetal  
27  
28 hydantoin syndrome (both diagnosed antenatally); and four neural tube defects (two identified  
29  
30 antenatally and two at birth). The congenital disorder data are still being cleaned for analysis with  
31  
32 pregnancy outcomes.  
33  
34  
35  
36  
37  
38  
39

#### 40 Published and other outputs

41  
42 We conducted an initial baseline assessment comparing clinical records to dispensing data before the  
43  
44 implementation of the PER[22] and recently updated the analysis demonstrating the value of  
45  
46 combining PER and electronic pharmacy data in improving medicine exposure ascertainment[3]. We  
47  
48 are currently investigating the impact of data source on gestational age (Malaba T, manuscript in  
49  
50 preparation) and hypertensive disorders of pregnancy[34]. PER data have contributed to population-  
51  
52 based analyses describing the use and safety of sodium valproate and isoniazid for TB preventive  
53  
54 therapy in pregnancy[35, 36]. In addition, initiation of the PER provided the opportunity to host a  
55  
56 workshop, *Building Teratovigilance Capacity in Africa*, which provided networking and training  
57  
58  
59  
60

opportunities to 60 delegates from sub-Saharan Africa  
<https://globalpharmacovigilance.tghn.org/resources/building-teratovigilance-capacity-africa/>.

## System strengthening

In addition to the employment of project-specific staff, embedded with computers at the facilities, the project supports on-going training of clinical staff to improve and standardize clinical history-taking with an emphasis on exposures, neonatal examination and clinical record keeping. Open resources include the WHO/TDR *Stepwise Surface Examination of the Newborn* (<https://www.who.int/tdr/publications/videos/stepwise-surface-examination-newborns/en/>) and the training modules for midwives we developed as part of the South African National Pregnancy Exposure Registry (<https://www.ubomibuhle.org.za/training-lessons>)[37]. These resources are freely available and are now in use at PER sites across South Africa.

## Strengths and Weaknesses

### Strengths

The integration of the PER within the PHDC greatly increases the completeness of the data. It facilitates identification of pregnancy outcomes at facilities outside our sentinel referral chains reducing loss to follow-up. Harmonization and triangulation of two data sources for medicine exposures (i.e., clinical records and electronic pharmacy records) provides a more robust summary of exposures than either alone[3, 17, 22]. These systems comprise unique infrastructure able to address clinical and public health concerns in a low-middle income setting.

1  
2  
3 Accurate timing of exposures over the course of pregnancy is crucial to assess potential associations  
4 with adverse pregnancy outcomes. Collecting multiple reference points for gestational age (i.e.,  
5 neonatal record, ultrasound, last menstrual period, symphysis-fundal height) enabled the  
6 development of a hierarchy of methods and the allocation of a confidence score to the reported  
7 gestational age[38-40]. This offers an advantage over insurance claims datasets which are often used  
8 to determine safety information and in which pregnancy and gestational age must be inferred from  
9 clinical coding alone.  
10  
11  
12  
13  
14  
15  
16  
17  
18  
19  
20  
21

22 In line with WHO recommendations[20], all women attending the PER primary care sites are enrolled  
23 and we reflect background rates of important pregnancy parameters similar to what is expected from  
24 national aggregate data. This will be expanded to include background rates for congenital disorders,  
25 data which are lacking in South Africa[41]. This structure also allows for the analysis of multiple current  
26 and potential future exposures and emerging health concerns e.g., novel medicines and vaccines such  
27 as for SARS-CoV-2.  
28  
29  
30  
31  
32  
33  
34  
35  
36  
37  
38  
39

40 From the outset, it was important to avoid a parallel system and support project sustainability. The  
41 PER has been integrated into the existing clinical and clerical routines and uses local electronic health  
42 information platforms. It allows for electronic generation of key monthly indicators at primary care  
43 sites that are otherwise collected by hand.  
44  
45  
46  
47  
48  
49  
50  
51

52 As the cohort expands, capacity to conduct nested studies that facilitate signal detection and signal  
53 verification of potential or suspected teratogens will improve. The collection of individual-level data  
54 in a large prospectively enrolled cohort, representative of both urban and rural WC populations who  
55  
56  
57  
58  
59  
60



1  
2  
3 use public sector services will support more robust analyses that can better account for confounding  
4  
5 factors in such observational data.  
6  
7  
8  
9

## 10 Weaknesses

11  
12  
13  
14 The PER digitizes clinical data recorded in operational stationery and we cannot control for data quality  
15  
16 nor account for missing data in the source documents. To address this, we have engaged in on-going  
17  
18 training at the sites with an emphasis on drug history taking, medical record-keeping and neonatal  
19  
20 examination offering in-person teaching and video tutorials. Clinical staff have been provided with  
21  
22 Medicine Identification Aids with photographs of common formulations and packaging, and the WHO  
23  
24 Birth Defects atlas[42]. However, misclassification remains a potential risk.  
25  
26  
27  
28  
29

30  
31 Notwithstanding the advantages of the individual-level data available within the PHDC, data are  
32  
33 limited to those that are entered into one of the electronic medical records systems used in the public  
34  
35 sector. In terms of medicine exposures, the PER documents dispensed medication which may not  
36  
37 reflect actual use. In addition, medicines obtained outside of the public sector systems, from private  
38  
39 doctors or over-the-counter from pharmacies are not included unless they are noted in the clinical  
40  
41 records[3]. Similarly, traditional and complementary medicines lack a linked electronic footprint and  
42  
43 are not included.  
44  
45  
46  
47  
48  
49

50 The PER database is parsimonious by design and necessity and we are unable to account for  
51  
52 unmeasured confounders. However, data fields are collected for the entire cohort who are all drawn  
53  
54 from the same geographical areas served by the primary care clinics. Additionally, we record limited  
55  
56 data on lifestyle factors relevant in pregnancy (weight gain, exposure to tobacco, alcohol, recreational  
57  
58 drugs) which are lacking from equivalent population datasets based on insurance claims data.  
59  
60

### Collaboration

As with the PHDC within which it is located, the PER can address clinical, operational and research needs, and data access is specific to each. Aggregate reports are available to managers. Data are anonymised using standard protocols for de-identifying records before they are shared with researchers who are not directly engaged in the women's clinical care. It is anticipated that such de-identified individual-level data may be shared as part of the South African National Pregnancy Registry[37] and with similar PER initiatives regionally or internationally[43]. Data-sharing commitments are particularly relevant to research of rare events such as congenital disorders[20]. The PHDC has in-built privacy systems and strict governance structures managing the protection and use of health data for both service and research purposes and these apply to the PER[21].

### Patient and public involvement

The PER is integrated into the data collection and curation services of the Western Cape Government Department of Health and clinical and other service providers have engaged with the project since its inception. The data are available to managers as aggregate reports and to contribute to the electronic clinical records accessible by clinicians. Feedback from users contributes iteratively to optimization of the PER to improve health outcomes for pregnant women and infants.

### Conclusions

Research on medicine safety in pregnancy requires data on individual pregnancies, mother-infant linkage, medication exposure, gestational age at exposure, and maternal and birth outcomes. Data completeness and robustness continues to improve with on-going training, evolution of routine clinical information systems, and increasing political focus on pregnancy exposures. The cohort is well-placed to detect large signals in pregnancy outcomes as novel maternal exposures are introduced, and

1  
2  
3 to contribute to cohort harmonization for rarer outcomes and address the lack of information on  
4 congenital disorders in Africa.  
5  
6  
7  
8  
9

#### 10 11 Ethics approval 12

13  
14 The WC PER has been approved by the Faculty of Health Sciences Human Research Ethics Committees  
15 of the University of Cape Town (HREC: 749/2015) and Stellenbosch University (N17/04/040,  
16 N20/08/084), and the Western Cape Government Health Research Committee. The requirement for  
17 individual informed consent was waived by the ethics committee and all data were anonymized before  
18 being transferred for analysis.  
19  
20  
21  
22  
23  
24  
25  
26  
27  
28

#### 29 Funding 30

31 This work was supported by the US National Institutes of Health [R01HD080465, U01AI069911,  
32 U01AI069924, K43TW010683], Bill and Melinda Gates Foundation [INV-004508; 1164272; 1191327;  
33 INV-004657], the Wellcome Trust [203135/Z/16/Z], the International AIDS Society [2017-518/SLO],  
34 the United States Agency for International Development [72067418CA00023] and the US Centers for  
35 Disease Control and Prevention [GH001934].  
36  
37  
38  
39  
40  
41  
42  
43  
44  
45  
46

#### 47 Acknowledgements 48

49 We acknowledge and thank the PER data teams in Cape Town and Worcester, and the clinical and  
50 management staff at the facilities. The support and investment of the subdistrict and provincial health  
51 management is crucial to maintaining the initiative. We further acknowledge colleagues from the  
52 Western Cape Government: Health and the City of Cape Town.  
53  
54  
55  
56  
57  
58  
59  
60

1  
2  
3 Author contributions  
4

5  
6 Conception and design: EK, UM, AB, ALS, MAD, LM  
7

8  
9 Design and Implementation including data systems: EK, UM, ALS, GP, KF, JE  
10

11  
12 Data harmonization: AH, FP, JE, AB, MAD, EK  
13

14  
15 Clinical oversight: GP, MK, CS, NR, SG, AO, KF  
16

17  
18 Data cleaning & analysis: EK, ALS, UM, KA, AH  
19

20  
21 All authors critically reviewed the manuscript.  
22  
23  
24  
25

26 Conflict of interests  
27

28  
29 EK, AB, MAD and KA received funding from Viiv Healthcare unrelated to this project.  
30

31  
32 The authors declare no conflicts of interest.  
33  
34  
35  
36  
37  
38  
39  
40  
41  
42  
43  
44  
45  
46  
47  
48  
49  
50  
51  
52  
53  
54  
55  
56  
57  
58  
59  
60

## References

1. Daw JR, Hanley GE, Greyson DL, Morgan SG. Prescription drug use during pregnancy in developed countries: a systematic review. *Pharmacoepidemiol Drug Saf.* 2011;20(9):895-902.
2. Mohseni M, Azami-Aghdash S, Gareh Sheyklo S, Moosavi A, Nakhaee M, Pournaghi-Azar F, et al. Prevalence and Reasons of Self-Medication in Pregnant Women: A Systematic Review and Meta-Analysis. *Int J Community Based Nurs Midwifery.* 2018;6(4):272-84.
3. van der Hoven J, Allen E, de Waal R, Cois A, Maartens G, Myer L, et al. Antenatal medicine use in South African women: a comparison of three methods of ascertainment. *BMC Pregnancy Childbirth.* 2022;(under review).
4. Zash R, Holmes L, Diseko M, Jacobson DL, Brummel S, Mayondi G, et al. Neural-Tube Defects and Antiretroviral Treatment Regimens in Botswana. *N Engl J Med.* 2019;381(9):827-40.
5. Zash R, Makhema J, Shapiro RL. Neural-Tube Defects with Dolutegravir Treatment from the Time of Conception. *N Engl J Med.* 2018;379(10):979-81.
6. Gupta A, Montepiedra G, Aaron L, Theron G, McCarthy K, Bradford S, et al. Isoniazid Preventive Therapy in HIV-Infected Pregnant and Postpartum Women. *N Engl J Med.* 2019;381(14):1333-46.
7. Bianchi DW, Kaeser L, Cernich AN. Involving Pregnant Individuals in Clinical Research on COVID-19 Vaccines. *JAMA.* 2021;325(11):1041-2.
8. World Health Organization. Rapid Communication on forthcoming changes to the programmatic management of tuberculosis preventive treatment Geneva: World Health Organization; 2020 [Available from: <https://www.who.int/publications/m/item/WHO-UCN-TB-2020.4>.] (Accessed 17 March 2022)
9. World Health Organization. CONSOLIDATED GUIDELINES ON HIV PREVENTION, TESTING, TREATMENT, SERVICE DELIVERY AND MONITORING: RECOMMENDATIONS FOR A PUBLIC HEALTH APPROACH Geneva: World Health organization; 2021 [Available from: <https://www.who.int/publications/i/item/9789240031593>.] (Accessed 17 March 2022)
10. World Health Organization. COVID-19 vaccines: safety surveillance manual, second edition Geneva: World Health Organization; 2021 [Available from: <https://www.who.int/publications/i/item/10665345178>.] (Accessed 17 March 2022)
11. Craig AM, Hughes BL, Swamy GK. Coronavirus disease 2019 vaccines in pregnancy. *Am J Obstet Gynecol MFM.* 2021;3(2):100295.
12. Gupta A, Hughes MD, Garcia-Prats AJ, McIntire K, Hesselting AC. Inclusion of key populations in clinical trials of new antituberculosis treatments: Current barriers and recommendations for pregnant and lactating women, children, and HIV-infected persons. *PLoS Med.* 2019;16(8):e1002882.
13. Moodley J, Ngene NC, Khaliq OP, Hunter M. An imperative to offer pregnant and lactating women access to the COVID-19 vaccination roll-out programme. *S Afr Med J.* 2021;111(6):567-9.
14. World Health Organization, International Maternal Pediatric Adolescent AIDS Clinical Trials Network. APPROACHES TO ENHANCE AND ACCELERATE STUDY OF NEW DRUGS FOR HIV AND ASSOCIATED INFECTIONS IN PREGNANT WOMEN. Geneva: World Health Organization; 2021. [<https://www.who.int/publications/i/item/9789240040182> ]. (Accessed 17 March 2022)
15. Holmes LB, Wyszynski DF. North American antiepileptic drug pregnancy registry. *Epilepsia.* 2004;45(11):1465.
16. Scheuerle A, Covington D. Clinical review procedures for the Antiretroviral Pregnancy Registry. *Pharmacoepidemiol Drug Saf.* 2004;13(8):529-36.
17. Gelperin K, Hammad H, Leishear K, Bird ST, Taylor L, Hampp C, et al. A systematic review of pregnancy exposure registries: examination of protocol-specified pregnancy outcomes, target sample size, and comparator selection. *Pharmacoepidemiol Drug Saf.* 2017;26(2):208-14.
18. Berrueta M, Ciapponi A, Bardach A, Cairolì FR, Castellano FJ, Xiong X, et al. Maternal and neonatal data collection systems in low- and middle-income countries for maternal vaccines active safety surveillance systems: A scoping review. *BMC Pregnancy Childbirth.* 2021;21(1):217.

19. Mehta U, Kalk E, Fairlie L, Boulle A, Rees H. Why South Africa urgently needs to support the development of pregnancy exposure registries. *S Afr Med J*. 2019;109(5):294-5.
20. Mehta U, Clerk C, Allen E, Yore M, Sevene E, Singlovic J, et al. Protocol for a drugs exposure pregnancy registry for implementation in resource-limited settings. *BMC Pregnancy Childbirth*. 2012;12:89.
21. Boulle A, Heekes A, Tiffin N, Smith M, Mutemaringa T, Zinyakatira N, et al. Data Centre Profile: The Provincial Health Data Centre of the Western Cape Province, South Africa. *Int J Popul Data Sci*. 2019;4(2):1143.
22. Mehta U, Heekes A, Kalk E, Boulle A. Assessing the value of Western Cape Provincial Government health administrative data and electronic pharmacy records in ascertaining medicine use during pregnancy. *S Afr Med J*. 2018;108(5):439-43.
23. Okoli GN, Myles P, Murray-Thomas T, Shepherd H, Wong ICK, Edwards D. Use of Primary Care Data in Research and Pharmacovigilance: Eight Scenarios Where Prescription Data are Absent. *Drug Saf*. 2021.
24. Day C, Gray C, Padayachee T, Cois A. Chapter 20, Health and Related Indicators. *South African Health Review 2020*. 2020.
25. South African Department of Health. Guideline for the Prevention of Mother to Child Transmission of Communicable Infections. In: Health, editor. Pretoria November 2019.
26. World Health Organization. WHO recommendations on antenatal care for a positive pregnancy experience. Geneva: WHO Library Cataloguing-in-Publication Data; 2016.
27. Holmes LB, Nasri HZ, Hunt AT, Zash R, Shapiro RL. Limited surface examination to evaluate potential teratogens in a resource-limited setting. *Birth Defects Res*. 2021;113(9):702-7.
28. Bonhoeffer J, Kochhar S, Hirschfeld S, Heath PT, Jones CE, Bauwens J, et al. Global alignment of immunization safety assessment in pregnancy - The GAIA project. *Vaccine*. 2016;34(49):5993-7.
29. Andrade SE, Berard A, Nordeng HME, Wood ME, van Gelder M, Toh S. Administrative Claims Data Versus Augmented Pregnancy Data for the Study of Pharmaceutical Treatments in Pregnancy. *Curr Epidemiol Rep*. 2017;4(2):106-16.
30. Grzeskowiak LE, Gilbert AL, Morrison JL. Investigating outcomes associated with medication use during pregnancy: a review of methodological challenges and observational study designs. *Reprod Toxicol*. 2012;33(3):280-9.
31. Massyn N, Day C, Ndlovu N, Padayachee T. *District Health Barometer 2019/2020*. Durban: Health Systems Trust; 2020.
32. National Perinatal Mortality and Morbidity Committee. *NAPEMMCO Triennial Report 2017 - 2019*. 2017-2019.
33. Provincial Perinatal Morbidity and Mortality Committee. *Western Cape Saving Babies Triennial Report 2017 -2019*. 2020.
34. Slogrove A, Davies MA, Williams P, Abrams E, Theron G, Cotton M, et al., editors. Hypertensive Disorders in Pregnancy and HIV: A Province-wide Cohort Analysis during 2018 and 2019 in the Western Cape, South Africa. 13th International Workshop on HIV Pediatrics; 2021 16-17 July 2021; virtual.
35. Kalk E, Heekes A, Mehta U, de Waal R, Jacob N, Cohen K, et al. Safety and Effectiveness of Isoniazid Preventive Therapy in Pregnant Women Living with Human Immunodeficiency Virus on Antiretroviral Therapy: An Observational Study Using Linked Population Data. *Clin Infect Dis*. 2020;71(8):e351-e8.
36. Mehta U, Smith M, Kalk E, Hayes H, Swart A, Tucker L, et al. Understanding and Responding to Prescribing Patterns of Sodium Valproate-Containing Medicines in Pregnant Women and Women of Childbearing Age in Western Cape, South Africa. *Drug Saf*. 2021;44(1):41-51.
37. Buhle U. Understanding Birth Outcomes for Mothers and Infants: Building Healthcare by Linking Exposures 2021 [Available from: <https://www.ubomibuhle.org.za/>.]
38. Geerts L, Poggenpoel E, Theron G. A comparison of pregnancy dating methods commonly used in South Africa: a prospective study. *S Afr Med J*. 2013;103(8):552-6.

- 1  
2  
3 39. Malaba TR, Newell ML, Madlala H, Perez A, Gray C, Myer L. Methods of gestational age  
4 assessment influence the observed association between antiretroviral therapy exposure, preterm  
5 delivery, and small-for-gestational age infants: a prospective study in Cape Town, South Africa. *Ann*  
6 *Epidemiol.* 2018;28(12):893-900.  
7  
8 40. Quinn JA, Munoz FM, Gonik B, Frau L, Cutland C, Mallett-Moore T, et al. Preterm birth: Case  
9 definition & guidelines for data collection, analysis, and presentation of immunisation safety data.  
10 *Vaccine.* 2016;34(49):6047-56.  
11 41. Lebesse V, Aldous C, Malherbe HL. South African congenital disorders data, 2006 - 2014. *S Afr*  
12 *Med J.* 2016;106(10):992-5.  
13 42. WHO/CDC/ICBDSR. Birth defects surveillance: atlas of selected congenital anomalies. Geneva:  
14 World Health Organization; 2014.  
15 43. ALeDEA-East Africa. Measuring Adverse Pregnancy & Newborn Outcomes (MANGO): an IeDEA  
16 Collaboration Study 2021 [Available from: <https://globalhealth.iu.edu/research/iedea-main-page/>.]  
17  
18  
19  
20  
21  
22  
23  
24  
25  
26  
27  
28  
29  
30  
31  
32  
33  
34  
35  
36  
37  
38  
39  
40  
41  
42  
43  
44  
45  
46  
47  
48  
49  
50  
51  
52  
53  
54  
55  
56  
57  
58  
59  
60

Table 1. Summary of Data Elements in the PER

| Variables collected                                                                                                                                                                                                                                                                                                                              | Calculated parameters                                                                                                                    | MOU aggregate statistics                                                                                                                                                                                                                              |
|--------------------------------------------------------------------------------------------------------------------------------------------------------------------------------------------------------------------------------------------------------------------------------------------------------------------------------------------------|------------------------------------------------------------------------------------------------------------------------------------------|-------------------------------------------------------------------------------------------------------------------------------------------------------------------------------------------------------------------------------------------------------|
| <i>Antenatal</i><br>Maternal date of birth<br>Date of first antenatal visit<br>Last menstrual period<br>Parity, Gravidity<br>Obstetric & Medical history<br>Chronic medication<br>Height, mid-upper arm circumference, weight, blood pressure, urinalysis<br>Symphysis fundal height<br>Alcohol, tobacco, drug use<br>Number of antenatal visits | Gestational age at first antenatal visit                                                                                                 | Number of first visits<br>Number of women first ANC < 20 weeks<br>Number age < 20 years or > 38 years<br>Number grand multipara (≥ 5 deliveries)<br>Number high blood pressure/proteinuria                                                            |
| <i>Vertical transmission of HIV</i><br>HIV status at first antenatal visit<br>Subsequent positive HIV test<br>HIV treatment incl. regimen switches<br>CD4 count<br>Viral load<br>HIV-exposed infant HIV-PCR                                                                                                                                      | Number of women at high risk of vertical HIV transmission [18]<br>ART in hand at estimated time of conception<br>ART in hand at delivery | Number of women living with HIV:<br>Before pregnancy<br>During pregnancy<br>Number of women on ART (1 <sup>st</sup> & 2 <sup>nd</sup> line):<br>Before, during pregnancy<br>VL unsuppressed at pregnancy & delivery<br>Number of infant birth HIV-PCR |
| <i>Ultrasound</i><br>Gestational age<br>Abnormalities<br>Expected date of delivery                                                                                                                                                                                                                                                               |                                                                                                                                          | Number of ultrasounds conducted<br>Number multiple pregnancies                                                                                                                                                                                        |
| <i>Maternal outcome</i><br>Facility-based death                                                                                                                                                                                                                                                                                                  | Vital status                                                                                                                             | Maternal death                                                                                                                                                                                                                                        |
| <i>Peri-partum</i><br>Date & site of outcome                                                                                                                                                                                                                                                                                                     |                                                                                                                                          | Number of deliveries                                                                                                                                                                                                                                  |



|                                                                                                                                                                                         |                                                                                                                          |                                                                                                                      |
|-----------------------------------------------------------------------------------------------------------------------------------------------------------------------------------------|--------------------------------------------------------------------------------------------------------------------------|----------------------------------------------------------------------------------------------------------------------|
| Method of delivery<br>Gestational age at outcome                                                                                                                                        | Prematurity (< 37 completed weeks gestation)                                                                             |                                                                                                                      |
| <i>Pregnancy outcome</i><br>Livebirth<br>Stillbirth<br>Miscarriage<br>Termination of pregnancy<br>Ectopic pregnancy<br>Molar pregnancy                                                  | Gestational age at pregnancy outcome                                                                                     | Number of livebirths, stillbirths, miscarriages                                                                      |
| <i>Neonate</i><br>Date of birth<br>Sex, APGAR scores<br>Gestational age<br>Birth weight, length, head circumference, foot length<br>Neonatal surface examination<br>Abnormalities noted | Gestational age at birth<br>Low birth weight (< 2500g)<br>Prematurity (< 37 completed weeks gestation)<br>Neonatal death | Number of low birth weight infants<br>Number premature infants<br>Number neonatal deaths<br>Perinatal mortality rate |

ANC – antenatal care; ART – antiretroviral therapy; HIV – Human Immune Deficiency Virus; MOU – midwife obstetric unit; PCR – polymerase chain reaction

Table 2. Maternal and obstetric characteristics of the cohort 2018-2019

| Variable                                          | PER total<br>n = 14 527 | PER urban<br>n = 9435 (65%) | PER rural<br>n = 5092 (35%) |
|---------------------------------------------------|-------------------------|-----------------------------|-----------------------------|
| Age (years) median (IQR)                          | 27 (23 – 32)            | 28 (23 – 33)                | 26 (22 – 31)                |
| Living with HIV at pregnancy outcome              | 3931 (27.1)             | 3241 (34.3)                 | 690 (13.6)                  |
| Obstetric ultrasound present n (%)                | 5583 (38.4)             | 4063 (43.1)                 | 1520 (29.9)                 |
| Early ultrasound (i.e. < 22 weeks) n (%<br>of US) | 3345 (59.9)             | 2393 (58.9)                 | 952 (62.6)                  |
| Potentially unsafe medicine exposure              | 1287 (9.0)              | 857 (9.3)                   | 430 (8.5)                   |
| Gestational age at birth (weeks)<br>median (IQR)  | 40 (37 – 40)            | 40 (36 – 40)                | 39 (35 – 40)                |
| Birth weight (grams) median (IQR)                 | 3100 (2750 –<br>3440)   | 3140 (2800 –<br>3480)       | 2975 (2575 – 3320)          |
| Low birth weight <sup>a</sup> n (%)               | 1736 (12.0)             | 879 (9.3)                   | 857 (16.8)                  |
| Premature birth <sup>b</sup> n(%)                 | 2949 (20.3)             | 1735 (18.4)                 | 1214 (23.8)                 |
| Pregnancy outcome n (%)                           |                         |                             |                             |
| Live birth                                        | 12 419 (85.5)           | 1189 (82.3)                 | 4630 (90.9)                 |
| Still birth                                       | 296 (2.0)               | 180 (1.9)                   | 116 (2.3)                   |
| Neonatal death <sup>c</sup>                       | 109 (0.8)               | 71 (0.5)                    | 36 (0.7)                    |
| Miscarriage                                       | 395 (2.7)               | 318 (3.4)                   | 77 (1.5)                    |
| Ectopic pregnancy                                 | 82 (0.6)                | 60 (0.6)                    | 22 (0.4)                    |
| Termination of pregnancy                          | 273 (1.9)               | 223 (2.4)                   | 50 (1.0)                    |
| Unknown                                           | 953 (6.6)               | 792 (8.4)                   | 161 (3.1)                   |
| Delivery method <sup>d</sup> n(%)                 |                         |                             |                             |
| Born before arrival at birthing facility          | 608 (4.7)               | 245 (3.1)                   | 363 (7.6)                   |
| Vaginal delivery                                  | 7587 (59.2)             | 4655 (57.9)                 | 2932 (61.3)                 |
| Assisted delivery <sup>e</sup>                    | 140 (1.1)               | 51 (0.6)                    | 89 (1.9)                    |
| Caesarean section                                 | 3416 (26.6)             | 2411 (30.0)                 | 1005 (21.0)                 |
| Unknown                                           | 1073 (8.4)              | 680 (8.5)                   | 393 (8.2)                   |
| Infant outcome <sup>d</sup> n(%)                  |                         |                             |                             |
| Stillborn                                         | 296 (2.3)               | 180 (2.2)                   | 116 (2.4)                   |
| Early neonatal death <sup>c</sup>                 | 80 (0.6)                | 55 (0.7)                    | 25 (0.5)                    |
| Late neonatal death                               | 29 (0.2)                | 18 (0.2)                    | 11 (0.2)                    |
| Alive                                             | 12 419 (96.8)           | 7798 (96.9)                 | 4630 (96.8)                 |
| Tobacco use <sup>f</sup> n(%)                     |                         |                             |                             |
| Current user                                      | 1297 (8.9)              | 87 (0.9)                    | 1210 (23.8)                 |
| Past user                                         | 55 (0.4)                | 13 (0.1)                    | 42 (0.8)                    |
| Never user                                        | 9997 (68.8)             | 7222 (76.5)                 | 2775 (54.5)                 |
| Not reported                                      | 3178 (21.9)             | 2113 (14.5)                 | 1065 (7.3)                  |
| Alcohol use <sup>f</sup> n(%)                     |                         |                             |                             |
| Current user                                      | 588 (4.1)               | 339 (3.6)                   | 249 (4.9)                   |
| Past user                                         | 167 (1.2)               | 66 (0.7)                    | 101 (2.0)                   |
| Never user                                        | 10 570 (72/8)           | 6885 (73.0)                 | 3685 (72.4)                 |
| Not reported                                      | 3202 (22.0)             | 2145 (14.8)                 | 1057 (7.3)                  |

<sup>a</sup> birthweight<2500g; liveborn infants only

<sup>b</sup> birth < 37 completed weeks gestation; liveborn infants only

1  
2  
3 <sup>c</sup> neonatal death: death before 28 days of life; early neonatal death: death before 7 days of  
4 life; late neonatal death: death between 8 and 28 days of life

5  
6 <sup>d</sup> viable pregnancies (i.e. >27 weeks gestation(17)) (n=12 824)

7 <sup>e</sup> forceps or vacuum delivery

8 <sup>f</sup> reported at first antenatal visit  
9  
10  
11  
12  
13  
14  
15  
16  
17  
18  
19  
20  
21  
22  
23  
24  
25  
26  
27  
28  
29  
30  
31  
32  
33  
34  
35  
36  
37  
38  
39  
40  
41  
42  
43  
44  
45  
46  
47  
48  
49  
50  
51  
52  
53  
54  
55  
56  
57  
58  
59  
60

For peer review only

Table 3. Comparison between PER reported or calculated PER outcomes and aggregate indicators in formal provincial information systems

| Indicator                                                            | PER total<br>n = 14 527 | PER urban<br>n = 9435 (65%) | PER rural<br>n = 5092 (35%) | Reported aggregate for<br>the Western Cape 2017<br>- 2019 <sup>a</sup> |
|----------------------------------------------------------------------|-------------------------|-----------------------------|-----------------------------|------------------------------------------------------------------------|
| Still birth <sup>b</sup> n (%)                                       | 296 (2.0)               | 180 (1.9)                   | 116 (2.4)                   | 2.2% <sup>26</sup>                                                     |
| Per 1000 births                                                      | 20.0                    | 19.1                        | 24.0                        | 18.5 <sup>17</sup><br>22.1 <sup>25,26</sup>                            |
| Neonatal death in facility<br>rate <sup>c</sup> per 1000 live births | 8.7                     | 9.2                         | 7.7                         | 8.9 <sup>17,25</sup>                                                   |
| Perinatal mortality rate <sup>d</sup><br>per 1000 births             | 29                      | 29                          | 29                          | 25.6 <sup>17</sup><br>27.9 <sup>25</sup><br>29.1 <sup>26</sup>         |
| Low birth weight <sup>e</sup> n(%)                                   | 1737 (12.0)             | 879 (9.3)                   | 857 (16.8)                  | 14.9% urban subdistrict<br>18.4% rural subdistrict <sup>26</sup>       |
| Maternal mortality in facility<br>ratio per 100 000 live births      |                         | 63.5                        | Insufficient<br>data        | 43.6 – 66.8 <sup>25</sup>                                              |
| Teenage pregnancies (10 –<br>19 years) n(%)                          | 929 (6.4)               | 450 (4.8)                   | 497 (9.4)                   | 3.5% urban subdistrict<br>7.3% rural subdistrict <sup>26</sup>         |
| Caesarean section rate per<br>1000 births                            | 3416 (26.6)             | 2411 (30.0)                 | 1005 (21.0)                 | 28.9 <sup>25</sup> - 29.3 <sup>26</sup>                                |

<sup>a</sup> includes aggregate reports compiled from the District Health Information System and Perinatal Problem Identification Programme<sup>17, 25-26</sup>

<sup>b</sup> delivery of a baby with no signs of life after 27 completed weeks of gestation (i.e., viable baby born dead)

<sup>c</sup> death before 28 days of life

<sup>d</sup> still birth plus neonatal deaths <8 days per 1000 births

<sup>e</sup> birthweight<2500g; liveborn infants only

Table 4. Congenital Disorders in PER 2018 – 2019; urban site only (alphabetical)

|                 | Disorder                                         | Number |
|-----------------|--------------------------------------------------|--------|
| Major disorders | Cardiac                                          | 1      |
|                 | Cleft palate                                     | 2      |
|                 | Congenital diaphragmatic hernia                  | 2      |
|                 | CNS excluding neural tube defect                 | 2      |
|                 | Fetal alcohol syndrome                           | 1      |
|                 | Fetal hydantoin syndrome                         | 2      |
|                 | Hypospadias                                      | 2      |
|                 | Jejunal atresia                                  | 1      |
|                 | Neural tube defect                               | 4      |
|                 | Not otherwise specified                          | 1      |
|                 | Omphalocele                                      | 1      |
|                 | Renal                                            | 1      |
|                 | Recto-membranous urethral fistula                | 1      |
|                 | Skeletal dysplasia                               | 1      |
| Trisomies       |                                                  |        |
| T21             | 2                                                |        |
| T13             | 1                                                |        |
| Minor disorders | Pre-axial polydactyly                            | 8      |
|                 | Subglottic stenosis (not requiring intervention) | 1      |
|                 | Undescended testes                               | 3      |

CNS – central nervous system

Supplementary Table 1. Potentially unsafe medicines, excluding ART, identified in the PER over the course of gestation (alphabetical)

| <b>Name</b>                                |
|--------------------------------------------|
| <u>Carbamazepine</u>                       |
| <u>Carbimazole</u>                         |
| <u>Diazepam</u>                            |
| <u>Doxycycline</u>                         |
| <u>Enalapril</u>                           |
| <u>Gentamicin</u>                          |
| <u>Ibuprofen</u>                           |
| <u>Lithium</u>                             |
| <u>Losartan</u>                            |
| <u>Phenytoin</u>                           |
| <u>Sulfamethoxazole &amp; trimethoprim</u> |
| <u>Valproate</u>                           |
| <u>Warfarin</u>                            |

ART – antiretroviral therapy

STROBE Statement—Checklist of items that should be included in reports of *cohort studies*

|                              | Item No | Recommendation                                                                                                                                                                                    | page                                                  |
|------------------------------|---------|---------------------------------------------------------------------------------------------------------------------------------------------------------------------------------------------------|-------------------------------------------------------|
| <b>Title and abstract</b>    | 1       | (a) Indicate the study's design with a commonly used term in the title or the abstract                                                                                                            | 1                                                     |
|                              |         | (b) Provide in the abstract an informative and balanced summary of what was done and what was found                                                                                               | 3                                                     |
| <b>Introduction</b>          |         |                                                                                                                                                                                                   |                                                       |
| Background/rationale         | 2       | Explain the scientific background and rationale for the investigation being reported                                                                                                              | 5-7                                                   |
| Objectives                   | 3       | State specific objectives, including any prespecified hypotheses                                                                                                                                  | 7                                                     |
| <b>Methods</b>               |         |                                                                                                                                                                                                   |                                                       |
| Study design                 | 4       | Present key elements of study design early in the paper                                                                                                                                           | 7-8                                                   |
| Setting                      | 5       | Describe the setting, locations, and relevant dates, including periods of recruitment, exposure, follow-up, and data collection                                                                   | 7 - 10                                                |
| Participants                 | 6       | (a) Give the eligibility criteria, and the sources and methods of selection of participants. Describe methods of follow-up                                                                        | 8-9                                                   |
|                              |         | (b) For matched studies, give matching criteria and number of exposed and unexposed                                                                                                               | N/A                                                   |
| Variables                    | 7       | Clearly define all outcomes, exposures, predictors, potential confounders, and effect modifiers. Give diagnostic criteria, if applicable                                                          | 11-12, 16                                             |
| Data sources/<br>measurement | 8*      | For each variable of interest, give sources of data and details of methods of assessment (measurement). Describe comparability of assessment methods if there is more than one group              | 11-12<br>Table 1                                      |
| Bias                         | 9       | Describe any efforts to address potential sources of bias                                                                                                                                         | 14-16                                                 |
| Study size                   | 10      | Explain how the study size was arrived at                                                                                                                                                         | N/A                                                   |
| Quantitative variables       | 11      | Explain how quantitative variables were handled in the analyses. If applicable, describe which groupings were chosen and why                                                                      | 12-13<br>Tables 2-4                                   |
| Statistical methods          | 12      | (a) Describe all statistical methods, including those used to control for confounding                                                                                                             | Cohort<br><i>description</i> ;<br>limited<br>analyses |
|                              |         | (b) Describe any methods used to examine subgroups and interactions                                                                                                                               | N/A                                                   |
|                              |         | (c) Explain how missing data were addressed                                                                                                                                                       | 14-16                                                 |
|                              |         | (d) If applicable, explain how loss to follow-up was addressed                                                                                                                                    | 16                                                    |
|                              |         | (e) Describe any sensitivity analyses                                                                                                                                                             | 12-13                                                 |
| <b>Results</b>               |         |                                                                                                                                                                                                   |                                                       |
| Participants                 | 13*     | (a) Report numbers of individuals at each stage of study—eg numbers potentially eligible, examined for eligibility, confirmed eligible, included in the study, completing follow-up, and analysed | 12-13                                                 |
|                              |         | (b) Give reasons for non-participation at each stage                                                                                                                                              | N/A                                                   |
|                              |         | (c) Consider use of a flow diagram                                                                                                                                                                |                                                       |
| Descriptive data             | 14*     | (a) Give characteristics of study participants (eg demographic, clinical, social) and information on exposures and potential confounders                                                          | 12-13<br>Tables 2-4                                   |
|                              |         | (b) Indicate number of participants with missing data for each variable of interest                                                                                                               | N/A                                                   |
|                              |         | (c) Summarise follow-up time (eg, average and total amount)                                                                                                                                       | N/A                                                   |
| Outcome data                 | 15*     | Report numbers of outcome events or summary measures over time                                                                                                                                    | 12-13                                                 |

Tables 2-4

|    |                          |    |                                                                                                                                                                                                              |            |
|----|--------------------------|----|--------------------------------------------------------------------------------------------------------------------------------------------------------------------------------------------------------------|------------|
| 1  |                          |    |                                                                                                                                                                                                              |            |
| 2  |                          |    |                                                                                                                                                                                                              |            |
| 3  | Main results             | 16 | (a) Give unadjusted estimates and, if applicable, confounder-adjusted estimates and their precision (eg, 95% confidence interval). Make clear which confounders were adjusted for and why they were included | N/A        |
| 4  |                          |    |                                                                                                                                                                                                              |            |
| 5  |                          |    |                                                                                                                                                                                                              |            |
| 6  |                          |    | (b) Report category boundaries when continuous variables were categorized                                                                                                                                    | N/A        |
| 7  |                          |    |                                                                                                                                                                                                              |            |
| 8  |                          |    |                                                                                                                                                                                                              |            |
| 9  |                          |    | (c) If relevant, consider translating estimates of relative risk into absolute risk for a meaningful time period                                                                                             |            |
| 10 |                          |    |                                                                                                                                                                                                              |            |
| 11 | Other analyses           | 17 | Report other analyses done—eg analyses of subgroups and interactions, and sensitivity analyses                                                                                                               | N/A        |
| 12 |                          |    |                                                                                                                                                                                                              |            |
| 13 |                          |    |                                                                                                                                                                                                              |            |
| 14 | <b>Discussion</b>        |    |                                                                                                                                                                                                              |            |
| 15 | Key results              | 18 | Summarise key results with reference to study objectives                                                                                                                                                     | 13-14      |
| 16 |                          |    |                                                                                                                                                                                                              |            |
| 17 | Limitations              | 19 | Discuss limitations of the study, taking into account sources of potential bias or imprecision. Discuss both direction and magnitude of any potential bias                                                   | 16         |
| 18 |                          |    |                                                                                                                                                                                                              |            |
| 19 |                          |    |                                                                                                                                                                                                              |            |
| 20 | Interpretation           | 20 | Give a cautious overall interpretation of results considering objectives, limitations, multiplicity of analyses, results from similar studies, and other relevant evidence                                   | 17-18      |
| 21 |                          |    |                                                                                                                                                                                                              |            |
| 22 |                          |    |                                                                                                                                                                                                              |            |
| 23 |                          |    |                                                                                                                                                                                                              |            |
| 24 | Generalisability         | 21 | Discuss the generalisability (external validity) of the study results                                                                                                                                        | 14, 17- 18 |
| 25 |                          |    |                                                                                                                                                                                                              |            |
| 26 | <b>Other information</b> |    |                                                                                                                                                                                                              |            |
| 27 | Funding                  | 22 | Give the source of funding and the role of the funders for the present study and, if applicable, for the original study on which the present article is based                                                | 18         |
| 28 |                          |    |                                                                                                                                                                                                              |            |
| 29 |                          |    |                                                                                                                                                                                                              |            |
| 30 |                          |    |                                                                                                                                                                                                              |            |

\*Give information separately for exposed and unexposed groups.

**Note:** An Explanation and Elaboration article discusses each checklist item and gives methodological background and published examples of transparent reporting. The STROBE checklist is best used in conjunction with this article (freely available on the Web sites of PLoS Medicine at <http://www.plosmedicine.org/>, Annals of Internal Medicine at <http://www.annals.org/>, and Epidemiology at <http://www.epidem.com/>). Information on the STROBE Initiative is available at <http://www.strobe-statement.org>.



# BMJ Open

## Cohort Profile: The Western Cape Pregnancy Exposure Registry (WCPER)

|                               |                                                                                                                                                                                                                                                                                                                                                                                                                                                                                                                                                                                                                                                                                                                                                                                                                                                                                                                                                                                                                                                                                                                                                                                                                                                                                                                                                                                                                                                                                                                                                                                                                                                                                                                                                                                                                                                                                                                                                                                                                                                                                                                                                                                                                                                                                                                                                                                                                                                                                                                                                                                                                    |
|-------------------------------|--------------------------------------------------------------------------------------------------------------------------------------------------------------------------------------------------------------------------------------------------------------------------------------------------------------------------------------------------------------------------------------------------------------------------------------------------------------------------------------------------------------------------------------------------------------------------------------------------------------------------------------------------------------------------------------------------------------------------------------------------------------------------------------------------------------------------------------------------------------------------------------------------------------------------------------------------------------------------------------------------------------------------------------------------------------------------------------------------------------------------------------------------------------------------------------------------------------------------------------------------------------------------------------------------------------------------------------------------------------------------------------------------------------------------------------------------------------------------------------------------------------------------------------------------------------------------------------------------------------------------------------------------------------------------------------------------------------------------------------------------------------------------------------------------------------------------------------------------------------------------------------------------------------------------------------------------------------------------------------------------------------------------------------------------------------------------------------------------------------------------------------------------------------------------------------------------------------------------------------------------------------------------------------------------------------------------------------------------------------------------------------------------------------------------------------------------------------------------------------------------------------------------------------------------------------------------------------------------------------------|
| Journal:                      | <i>BMJ Open</i>                                                                                                                                                                                                                                                                                                                                                                                                                                                                                                                                                                                                                                                                                                                                                                                                                                                                                                                                                                                                                                                                                                                                                                                                                                                                                                                                                                                                                                                                                                                                                                                                                                                                                                                                                                                                                                                                                                                                                                                                                                                                                                                                                                                                                                                                                                                                                                                                                                                                                                                                                                                                    |
| Manuscript ID                 | bmjopen-2021-060205.R2                                                                                                                                                                                                                                                                                                                                                                                                                                                                                                                                                                                                                                                                                                                                                                                                                                                                                                                                                                                                                                                                                                                                                                                                                                                                                                                                                                                                                                                                                                                                                                                                                                                                                                                                                                                                                                                                                                                                                                                                                                                                                                                                                                                                                                                                                                                                                                                                                                                                                                                                                                                             |
| Article Type:                 | Cohort profile                                                                                                                                                                                                                                                                                                                                                                                                                                                                                                                                                                                                                                                                                                                                                                                                                                                                                                                                                                                                                                                                                                                                                                                                                                                                                                                                                                                                                                                                                                                                                                                                                                                                                                                                                                                                                                                                                                                                                                                                                                                                                                                                                                                                                                                                                                                                                                                                                                                                                                                                                                                                     |
| Date Submitted by the Author: | 10-Jun-2022                                                                                                                                                                                                                                                                                                                                                                                                                                                                                                                                                                                                                                                                                                                                                                                                                                                                                                                                                                                                                                                                                                                                                                                                                                                                                                                                                                                                                                                                                                                                                                                                                                                                                                                                                                                                                                                                                                                                                                                                                                                                                                                                                                                                                                                                                                                                                                                                                                                                                                                                                                                                        |
| Complete List of Authors:     | <p>Kalk, Emma; University of Cape Town Faculty of Health Sciences, Centre for Infectious Disease Epidemiology &amp; Research</p> <p>Heekes, Alexa; University of Cape Town Faculty of Health Sciences, Centre for Infectious Disease Epidemiology &amp; Research; Western Cape Department of Health, Health Intelligence Directorate</p> <p>Slogrove, Amy; Stellenbosch University, Ukwanda Centre for Rural Health, Department of Global Health; Stellenbosch University, Department of Paediatrics &amp; Child Health</p> <p>Phelanyane, Florence; University of Cape Town Faculty of Health Sciences, Centre for Infectious Disease Epidemiology &amp; Research; Western Cape Department of Health, Health Intelligence Directorate</p> <p>Davies, Mary-Ann; University of Cape Town Faculty of Health Sciences, Centre for Infectious Disease Epidemiology &amp; Research; Western Cape Department of Health, Health Intelligence Directorate</p> <p>Myer, Landon; University of Cape Town Faculty of Health Sciences, Division of Epidemiology &amp; Biostatistics</p> <p>Euvrard, Jonathan; University of Cape Town Faculty of Health Sciences, Centre for Infectious Disease Epidemiology &amp; Research; Western Cape Department of Health, Health Intelligence Directorate</p> <p>Kroon, Max; University of Cape Town Faculty of Health Sciences, Neonatology; Mowbray Maternity Hospital, Neonatal Services</p> <p>Petro, Greg; University of Cape Town Faculty of Health Sciences, Department of Obstetrics &amp; Gynaecology; New Somerset Hospital, Maternity Services</p> <p>Fieggen, Karen; University of Cape Town Faculty of Health Sciences, Division of Human Genetics; Groote Schuur Hospital, Medical Genetics Services</p> <p>Stewart, Chantal; University of Cape Town Faculty of Health Sciences, Department of Obstetrics &amp; Gynaecology; Mowbray Maternity Hospital, Maternity Services</p> <p>Rhoda, Natasha; University of Cape Town Faculty of Health Sciences, Department of Paediatrics and Child Health; Mowbray Maternity Hospital, Neonatal Services</p> <p>Gebhardt, Stefan; Stellenbosch University, Department of Obstetrics &amp; Gynaecology; Tygerberg Hospital, Maternity Services</p> <p>Osman, Ayesha; University of Cape Town Faculty of Health Sciences, Department of Obstetrics &amp; Gynaecology; Groote Schuur Hospital, Maternity Services</p> <p>Anderson, Kim; University of Cape Town Faculty of Health Sciences, Centre for Infectious Disease Epidemiology &amp; Research</p> <p>Boulle, Andrew; University of Cape Town Faculty of Health Sciences,</p> |

|                                  |                                                                                                                                                                                                                                                         |
|----------------------------------|---------------------------------------------------------------------------------------------------------------------------------------------------------------------------------------------------------------------------------------------------------|
|                                  | Centre for Infectious Disease Epidemiology & Research; Western Cape Department of Health, Health Intelligence Directorate<br>Mehta, Ushma; University of Cape Town Faculty of Health Sciences,<br>Centre for Infectious Disease Epidemiology & Research |
| <b>Primary Subject Heading</b> : | Public health                                                                                                                                                                                                                                           |
| Secondary Subject Heading:       | Epidemiology, Health services research, Obstetrics and gynaecology, Pharmacology and therapeutics, Public health                                                                                                                                        |
| Keywords:                        | PUBLIC HEALTH, EPIDEMIOLOGY, Maternal medicine < OBSTETRICS, Fetal medicine < OBSTETRICS                                                                                                                                                                |
|                                  |                                                                                                                                                                                                                                                         |

SCHOLARONE™  
Manuscripts



I, the Submitting Author has the right to grant and does grant on behalf of all authors of the Work (as defined in the below author licence), an exclusive licence and/or a non-exclusive licence for contributions from authors who are: i) UK Crown employees; ii) where BMJ has agreed a CC-BY licence shall apply, and/or iii) in accordance with the terms applicable for US Federal Government officers or employees acting as part of their official duties; on a worldwide, perpetual, irrevocable, royalty-free basis to BMJ Publishing Group Ltd ("BMJ") its licensees and where the relevant Journal is co-owned by BMJ to the co-owners of the Journal, to publish the Work in this journal and any other BMJ products and to exploit all rights, as set out in our [licence](#).

The Submitting Author accepts and understands that any supply made under these terms is made by BMJ to the Submitting Author unless you are acting as an employee on behalf of your employer or a postgraduate student of an affiliated institution which is paying any applicable article publishing charge ("APC") for Open Access articles. Where the Submitting Author wishes to make the Work available on an Open Access basis (and intends to pay the relevant APC), the terms of reuse of such Open Access shall be governed by a Creative Commons licence – details of these licences and which [Creative Commons](#) licence will apply to this Work are set out in our licence referred to above.

Other than as permitted in any relevant BMJ Author's Self Archiving Policies, I confirm this Work has not been accepted for publication elsewhere, is not being considered for publication elsewhere and does not duplicate material already published. I confirm all authors consent to publication of this Work and authorise the granting of this licence.

1  
2  
3 *Cohort Profile: The Western Cape Pregnancy Exposure Registry (WCPER)*  
4  
5

6 Authors: Emma Kalk<sup>1\*</sup>, Alexa Heekes<sup>1,2</sup>, Amy Slogrove<sup>3,4</sup>, Florence Phelanyane<sup>1,2</sup>, Mary-Ann Davies<sup>1,2</sup>,  
7  
8 Landon Myer<sup>5</sup>, Jonathan Euvrard<sup>1,2</sup>, Max Kroon<sup>6,7</sup>, Greg Petro<sup>8,9</sup>, Karen Fieggen<sup>10,11</sup>, Chantal Stewart<sup>8,12</sup>,  
9  
10 Natasha Rhoda<sup>6,7</sup>, Stefan Gebhardt<sup>13,14</sup>, Ayesha Osman<sup>8,15</sup>, Kim Anderson<sup>1</sup>, Andrew Boulle<sup>1,2†</sup>, Ushma  
11  
12 Mehta<sup>1†</sup>  
13  
14

15  
16 1. Centre for Infectious Disease Epidemiology & Research and Division of Public Health Medicine,  
17  
18 School of Public Health & Family Medicine, University of Cape Town, South Africa  
19

20  
21 2. Health Intelligence Directorate, Western Cape Government Health, Cape Town, South Africa  
22

23  
24 3. Department of Paediatrics & Child Health, Faculty of Medicine & Health Sciences, Stellenbosch  
25  
26 University, Worcester, South Africa  
27

28  
29 4. Ukwanda Centre for Rural Health, Department of Global Health, Faculty of Medicine & Health  
30  
31 Sciences, Stellenbosch University, Worcester, South Africa  
32

33  
34 5. Division of Epidemiology & Biostatistics, School of Public Health & Family Medicine, University of  
35  
36 Cape Town, South Africa  
37

38  
39 6. Department of Paediatrics and Child Health, University of Cape Town, South Africa  
40

41  
42 7. Mowbray Maternity Hospital, Neonatal Services, Cape Town, South Africa  
43

44  
45 8. Department of Obstetrics & Gynaecology, University of Cape Town, South Africa  
46

47  
48 9. New Somerset Hospital, Maternity Services, Cape Town, South Africa  
49

50  
51 10. Division of Human Genetics, University of Cape Town, Cape Town, South Africa  
52

53  
54 11. Groote Schuur Hospital, Medical Genetics Service, Cape Town, South Africa  
55

56  
57 12. Mowbray Maternity Hospital, Maternity Services, Cape Town, South Africa  
58

59  
60 13. Department of Obstetrics & Gynaecology, Stellenbosch University, Cape Town, South Africa

1  
2  
3 14. Tygerberg Hospital Maternity Services, Cape Town, South Africa  
4  
5

6 15. Groote Schuur Hospital, Maternity Services, Cape Town South Africa  
7  
8  
9

10  
11  
12 \*corresponding author: Centre for Infectious Disease Epidemiology & Research, School of Public

13  
14 Health & Family Medicine, 5<sup>th</sup> floor Falmouth Building, University of Cape Town Faculty of Health

15  
16 Sciences, Anzio Road, Observatory, Cape Town  
17

18  
19 [emma.kalk@uct.ac.za](mailto:emma.kalk@uct.ac.za)  
20  
21

22 † Joint senior authors  
23  
24  
25  
26  
27  
28  
29  
30  
31  
32  
33  
34  
35  
36  
37  
38  
39  
40  
41  
42  
43  
44  
45  
46  
47  
48  
49  
50  
51  
52  
53  
54  
55  
56  
57  
58  
59  
60

## ABSTRACT

Purpose: The Western Cape Pregnancy Exposure Registry (PER) was established at two public sector healthcare sentinel sites in the Western Cape province, South Africa to provide on-going surveillance of drug exposures in pregnancy and associations with pregnancy outcomes.

Participants: Established in 2016, all women attending their first antenatal visit at primary care obstetric facilities were enrolled and followed to pregnancy outcome regardless of the site (i.e., primary, secondary, tertiary facility). Routine operational obstetric and medical data are digitized from the clinical stationery at the health care facilities. Data collection has been integrated into existing services and information platforms and supports routine operations. The PER is situated within the Provincial Health Data Centre, an information exchange that harmonizes and consolidates all health-related electronic data in the province. Data are contributed via linkage across a unique identifier. This relationship limits the missing data in the PER, allows validation and avoids misclassification in the population-level dataset.

Findings to date: Approximately 5000 and 3500 pregnant women enter the dataset annually at the urban and rural sites, respectively. As of August 2021, >30 000 pregnancies have been recorded and outcomes have been determined for 93%. Analysis of key obstetric and neonatal health indicators derived from the PER are consistent with the aggregate data in the District Health Information System.

Future plans: This represents significant infrastructure, able to address clinical and epidemiological concerns in a low/middle-income setting.

### Key words

Pregnancy Exposure Registry, Pharmacovigilance, Surveillance

### Strengths and Limitations of this Study

The Western Cape Pregnancy Exposure Registry (PER) provides on-going surveillance of drug exposures in pregnancy and associations with pregnancy outcomes.

Data collection is integrated into existing services and information platforms and supports routine operations.

The PER is situated within the Provincial Health Data Centre, an information exchange that harmonizes and consolidates all health-related electronic data which limits missing data, allows validation and avoids misclassification in the population-level dataset.

The PER digitizes clinical data recorded in operational stationery and we cannot control for data quality nor account for missing data in the source documents nor for unmeasured confounders.

Medicines obtained outside the public sector systems and traditional and complementary medicines are not included unless they are documented in the clinical stationery.

## *Cohort Profile: The Western Cape Pregnancy Exposure Registry*

### Introduction

Assessing medicine and vaccine safety in pregnancy requires on-going surveillance across multiple settings. In high-income countries, reviews of outpatient prescriptions and self-medication during pregnancy estimated exposure rates of up to 93% and 43%, respectively, excluding vitamins and supplements[1, 2]. Reports from Africa, the site of mass prevention and treatment campaigns for HIV, tuberculosis and malaria, are less frequent: we estimate that 79% - 99% of women in Cape Town use medicines antenatally[3].

Pregnant women have been systematically excluded from pharmaceutical trials and the efficacy, dosing and safety of many medicines used during pregnancy are uncertain or findings delayed until after the product is licensed and in use. Post-authorization safety assessments have traditionally relied on passive reporting of suspected medicine-related adverse events. Such systems have been limited by their dependence on voluntary reporting, variable data quality, absence of background rates of adverse birth outcomes including common congenital disorders, and lack of data to establish a denominator.

Recently, pharmacovigilance in pregnancy has drawn public and political attention following concerns about the initial signal of potential association observed between the antiretroviral integrase inhibitor, dolutegavir, and neural tube defects[4, 5], the potential risk of isoniazid preventive therapy in women living with HIV[6] (WLHIV), and SARS-CoV-2 vaccines[7]. With all these exposures, synthesis and meta-analysis of the available data has been re-assuring and the World Health Organization (WHO) guidelines recommends no contra-indication to their use in pregnant and breast-feeding women [8-



1  
2  
3 10]. In addition, there have been increased calls globally for the inclusion of pregnant women in clinical  
4 trials for new therapeutic and preventive agents, particularly in the field of infectious disease[11-14].  
5  
6  
7  
8  
9

10  
11 Pregnancy Exposure Registries (PER) are a form of surveillance, designed to iteratively detect adverse  
12 events within a defined pregnant population. Importantly, the prospective nature of PER allows  
13 collection of exposure and other data before the pregnancy outcome is known. The pharmaceutical  
14 industry maintains drug-specific registries for medicines and/or drug classes with known/suspected  
15 teratogenic effects (e.g., Anti-Epileptic Drug Registries) or as part of post-marketing commitments  
16 (e.g., the Antiretroviral Pregnancy Register) [15, 16]. In addition, teratology information services may  
17 collect data on pregnancy exposures. These PER depend on voluntary enrolment by clinicians and/or  
18 women, and many do not directly collect data from comparator groups but rely either on internal  
19 comparators or on an identified external comparator to provide background prevalence data[17].  
20 Background rates of adverse maternal and obstetric outcomes are necessary to determine deviations  
21 from expected proportions (signals). Such data may be limited or lacking in low- and middle-income  
22 countries[18, 19] or differ sufficiently from the source population so as to introduce bias (e.g., use of  
23 the Metropolitan Atlanta Congenital Defects Program as external comparator for USA-based  
24 studies[17].)  
25  
26  
27  
28  
29  
30  
31  
32  
33  
34  
35  
36  
37  
38  
39  
40  
41  
42  
43  
44  
45

46 The UNICEF/UNDP/World Bank/WHO Special Programme for Research & Training in Tropical Diseases  
47 (TDR) has developed a PER approach for resource-limited settings aimed at prospective data collection  
48 on exposures in a cohort of pregnant women attending antenatal care services at sentinel sites.  
49 Important for validity and causality determination, the approach recommends inclusion of *all* women  
50 presenting to the site to allow concurrent establishment of background rates and assessment of  
51 multiple potential exposures[20].  
52  
53  
54  
55  
56  
57  
58  
59  
60

1  
2  
3  
4  
5  
6 The Western Cape (WC) PER was established in Cape Town in 2016, adapted from the TDR template.  
7  
8 It was nested within the province-wide health information exchange, a component within a larger  
9  
10 project designed to assess the impact of WHO Option B+ for vertical HIV transmission prevention (i.e.,  
11  
12 universal lifelong antiretroviral therapy [ART] for pregnant and breast-feeding women) at the  
13  
14 population and individual levels[21]. Situating the PER within the linked information exchange avoided  
15  
16 some of the limitations of exclusive primary-care databases in that both electronic inpatient and  
17  
18 outpatient prescriptions are recorded as well as those from specialist and other off-site clinics, sources  
19  
20 which may be absent from primary-care records[3, 22, 23]. The design also supports augmentation of  
21  
22 the electronic clinical record for enrolled women, while providing a more secure, sustainable, and  
23  
24 ethically-viable platform for capturing clinical data on mothers and infants.  
25  
26  
27  
28  
29  
30  
31

32 We took a pragmatic approach to the establishment of the PER based on the availability of resources  
33  
34 and the desire to integrate into existing systems and operational routines, avoiding a parallel  
35  
36 infrastructure and supporting longevity. Data generated by the initiative are available for the  
37  
38 evaluation and improvement of clinical care as well as epidemiological review.  
39  
40  
41  
42  
43  
44

#### 45 Cohort description

46  
47 The PER has been established at two sentinel sites in the WC. Gugulethu Midwife Obstetric Unit  
48  
49 (GMOU) provides obstetric care to approximately 5000 women annually in Gugulethu, Cape Town a  
50  
51 low-income area with high unemployment and an antenatal HIV prevalence of approximately 30%.  
52  
53 GMOU refers patients to Mowbray Maternity (secondary) and Groote Schuur (tertiary) Hospitals.  
54  
55 About half of all women who attend GMOU are referred to hospital, antenatally or perinatally.  
56  
57 Worcester MOU (WMOU) is situated adjacent to the Worcester Provincial Hospital in Worcester, a  
58  
59  
60

1  
2  
3 town of approximately 230 000 in a farming community 120 kilometers outside Cape Town. WMOU  
4 provides delivery services for ~3600 women annually. The antenatal HIV prevalence is approximately  
5  
6 16%. Women requiring more advanced care are referred to Worcester (secondary) and Tygerberg  
7  
8 (tertiary) Hospitals. The community is structurally disadvantaged, and many depend on seasonal  
9  
10 employment on farms. In both areas the population is mobile; women move within the WC province  
11  
12 and may deliver outside the proscribed referral axes.  
13  
14  
15  
16  
17  
18  
19

20 Enrolment started at GMOU in Cape Town in September 2016 and at WMOU in January 2018.  
21  
22  
23  
24  
25

26 All women seeking care at the sentinel primary-care sites were included. Most women who use public  
27  
28 maternity services, including those with medical and obstetric complications, initially present to  
29  
30 primary care, therefore **situating enrolment at the primary-care facility allowed us to capture a**  
31  
32 **sample representative of the pregnant population in the geographic drainage area of that facility.**  
33  
34  
35  
36  
37  
38

### 39 Maternal and Child Health Services in the Western Cape

40  
41 Obstetric care is free at the point of service and approximately 65% of women present at/before 20  
42  
43 weeks gestation[24]. Antenatal care for uncomplicated pregnancies is provided at Basic Antenatal  
44  
45 Clinics and MOUs, the latter able to manage uncomplicated vaginal deliveries. At any stage during  
46  
47 pregnancy or peri-partum women can be referred to district, regional or tertiary hospitals according  
48  
49 to standard operating procedures. HIV testing is routine at timepoints throughout gestation and  
50  
51 WLHIV are initiated/re-initiated on ART[25]; those already receiving ART may transfer their HIV care  
52  
53 to the MOU. Clients with other underlying medical conditions (e.g., pre-existing hypertension,  
54  
55 diabetes mellitus, cardiac conditions) and/or who develop pregnancy-related medical conditions (e.g.,  
56  
57 hypertensive disorders of pregnancy, gestational diabetes) continue antenatal care at hospital. The  
58  
59  
60

1  
2  
3 MOU dispenses ART and antenatal supplements and preventive therapies recommended by the WHO  
4  
5 in pregnancy (i.e. iron and folate supplements, tetanus and influenza vaccines)[26]. Midwives treat  
6  
7 the common complaints of pregnancy (heartburn, nausea), urinary tract infection, vaginal candidiasis  
8  
9 and provide syndromic treatment for sexually transmitted infections (STI). Frequently, these  
10  
11 medicines are dispensed directly from *ward-stock* without a linked digital record, although details are  
12  
13 recorded in paper-based registers.  
14  
15  
16  
17  
18  
19

20 Within resource constraints, the WC endeavors to provide an antenatal ultrasound scan to clients  
21  
22 before 22 weeks gestation for determining gestational age. If concerns are identified women are up-  
23  
24 referred for formal fetal anomaly review.  
25  
26  
27  
28  
29

30 Antenatal visits, HIV testing, transfers and deliveries are recorded against patient names in individual  
31  
32 paper-based registers. Monthly aggregate statistics of key obstetric indicators (Table 1) are manually  
33  
34 counted from these registers and submitted centrally as part of the routine District Health Information  
35  
36 System platform.  
37  
38  
39  
40  
41  
42

### 43 Follow-up

44  
45 The Maternity Case Record (MCR) is a patient-held paper-based document distributed at the first  
46  
47 antenatal visit that serves as a record of all clinical obstetric care until discharge after pregnancy  
48  
49 outcome, regardless of level of care. It is utilized throughout South Africa and archived at the site of  
50  
51 outcome. Chronic medication and any agents dispensed during pregnancy should be recorded in the  
52  
53 MCR by the attending clinicians. However, medicines received at specialist clinics, during hospital  
54  
55 admissions and over-the-counter medicines are often not documented [3, 22].  
56  
57  
58  
59  
60

1  
2  
3 After birth, live- and still-born neonates are examined by the attending clinician (nurse  
4 midwife/doctor) and the outcome of the limited neonatal surface examination is recorded in the MCR.  
5  
6 This examination has been shown to detect most major congenital malformations in neonates, i.e.  
7 those that are visible and do not require diagnostic tools[27]. At GMOU, a clinician employed by the  
8 PER performs a review of clinical records to obtain additional data for congenital disorders and  
9 stillbirths. In the case of stillbirth, the placenta may be sent for histological examination.  
10  
11  
12  
13  
14  
15  
16  
17  
18  
19

20 In the WC, most women (99%) give birth at a health facility[24]. Those who do not, will bring their  
21 infants to the MOU soon after birth for review and registration.  
22  
23  
24  
25  
26  
27

28 **For the purposes of the PER, the MCR serves as the primary source of prospectively-collected clinical**  
29 **data.** Thus, women enter the cohort on first visit to the MOU and are followed up until pregnancy  
30 outcome.  
31  
32  
33  
34  
35  
36  
37

#### 38 Data collection

39  
40  
41 The PER digitizes routinely-collected data from the clinical stationery if not already digitized under  
42 existing service delivery. In addition to the patient-held MCR, data sources include primary-care dating  
43 ultrasound reports, and the STI and labour ward delivery registers. As we are using operational data,  
44 definitions have been aligned with operational clinical definitions in the WC. Using other routinely  
45 collected data elements (gestational age, neonate anthropometry) we are able to align case  
46 definitions with those of the Global Alignment of Immunization Safety Assessment in Pregnancy[28],  
47 allowing for harmonization of data and meaningful comparisons with equivalent datasets.  
48  
49 Additionally, we collect or calculate health indicators for the routine monthly aggregate reports  
50 required by the MOUs (Table 1).  
51  
52  
53  
54  
55  
56  
57  
58  
59  
60

1  
2  
3 Externally-funded PER data clerks are embedded at the facilities and project-augmented data  
4 collection is accommodated within the routine patient and document flow without disruption of  
5  
6 clinical care.  
7  
8  
9

10  
11  
12  
13 The provincial government of the WC operates as a single provider of public sector health services. A  
14  
15 9-digit numeric folder number which is common across the health platform for a given patient  
16  
17 facilitates the harmonization of all electronic health records within the Provincial Health Data Centre  
18  
19 (PHDC), the information exchange that consolidates all electronic administrative, pharmacy,  
20  
21 laboratory, and disease-specific information[21]. PER data are recorded against this identifier and  
22  
23 contribute to the PHDC.  
24  
25  
26  
27  
28  
29

30 All MOUs use the Primary Health Care Information Service (PHCIS) electronic medical records system  
31  
32 which records attendance against patient identifiers, and ART in WLHIV. PHCIS automatically  
33  
34 generates a unique folder number for live infants at birth, providing electronic linkage between  
35  
36 mother and baby. Clinicom performs this function at all hospitals. Data are imported daily by the  
37  
38 PHDC[21].  
39  
40  
41  
42  
43  
44

#### 45 Completeness of Medicine Exposure data

46  
47

48 Electronic dispensing data in the PHDC is augmented by the PER which captures medicine exposures  
49  
50 elicited from the women during the clinical consultation and ward-stock medicines recorded by  
51  
52 clinicians in the MCR. The PER also records some lifestyle factors (weight gain, alcohol, tobacco,  
53  
54 recreational drugs) that may act as confounders for certain outcomes. Combining the electronic  
55  
56 pharmacy data in the PHDC strengthens the ascertainment of exposures, providing a complete list of  
57  
58 medication dispensed from public sector pharmacies. Using multiple data sources for this has been  
59  
60

1  
2  
3 shown to provide a more complete picture of antenatal medicine use essential for pregnancy exposure  
4  
5 research[3, 29, 30].  
6  
7  
8  
9

## 10 Outcome Ascertainment

11  
12 Information on neonatal outcomes such as vital status, birth weight, gestational age, and APGAR  
13  
14 scores tend to be consistently captured across the cohort. The key findings of the neonatal surface  
15  
16 examinations, although often perfunctory, usually result in the recording of notable physical  
17  
18 anomalies. Internal anomalies such as cleft palate, hip dysplasias, and cardiac anomalies as well as  
19  
20 more subtle dysmorphic features may be missed at the time of the initial neonatal examination.  
21  
22 Details of neonatal deaths, and major congenital disorders often require review of inpatient records  
23  
24 at the delivery facilities.  
25  
26  
27  
28  
29  
30  
31  
32

33 PER data are imported daily into the PHDC and linked using patient identifiers, providing a  
34  
35 comprehensive electronic clinical record at the level of the individual which is accessible to the  
36  
37 attending clinicians. Both systems benefit greatly from this design. The PER allows for validation of  
38  
39 the provincial dataset as relates to pregnancy and delivery, and the PHDC is able to identify missing  
40  
41 outcomes (often at sites outside the referral axes) or exposures (from electronic pharmacy dispensing)  
42  
43 not included in the PER.  
44  
45  
46  
47  
48  
49

## 50 Findings to date

51  
52  
53 Between 01 September 2016 and 31 August 2021, 31 346 pregnancies were recorded in the PER. To  
54  
55 assess robustness of the dataset, we analysed data for a subset of women who attended their first  
56  
57 visit to antenatal care between 01 January 2018 and 31 December 2019 (Table 2). Over this two-year  
58  
59 period, 14 527 individual pregnancies were recorded in the PER: 9435 and 5092 at the urban and rural  
60

1  
2  
3 site, respectively. Outcomes were determined for 93.4% of pregnancies (n = 13 574). Gestational  
4  
5 dating scans were performed in 38.5% (n = 5583) of all enrolees, of whom 60% (n = 3345) were  $\leq 22$   
6  
7 weeks, facilitating more precise gestational dating at birth as well as timing of exposures. Overall,  
8  
9 1287 women (9%) were exposed to a medicines with pregnancy safety surveillance requirements  
10  
11 (Table 3 and Supplementary Table 1).  
12  
13  
14  
15  
16  
17

18 Where relevant, we compared rates of key adverse birth outcomes in the PER with official aggregate  
19  
20 routine indicator data for the WC [24, 31-33], derived from register aggregates reported through the  
21  
22 District Health Information System (DHIS) (Table 3). The comparisons are re-assuring across both the  
23  
24 urban and rural sites, validating the indicator outputs of the PER and demonstrating utility to the  
25  
26 services. The data will contribute to detailed aggregate reports for facility managers and streamline  
27  
28 the monthly submissions to the DHIS which are currently based on manual counts.  
29  
30  
31

32 The congenital disorder data are still being cleaned for analysis with pregnancy outcomes.  
33  
34  
35  
36  
37

### 38 Published and other outputs 39 40

41 We conducted an initial baseline assessment comparing clinical records to dispensing data before the  
42  
43 implementation of the PER[22] and recently updated the analysis demonstrating the value of  
44  
45 combining PER and electronic pharmacy data in improving medicine exposure ascertainment[3]. We  
46  
47 are currently investigating the impact of data source on gestational age (Malaba T, manuscript in  
48  
49 preparation) and hypertensive disorders of pregnancy[34]. PER data have contributed to population-  
50  
51 based analyses describing the use and safety of sodium valproate and isoniazid for TB preventive  
52  
53 therapy in pregnancy[35, 36]. In addition, initiation of the PER provided the opportunity to host a  
54  
55 workshop, *Building Teratovigilance Capacity in Africa*, which provided networking and training  
56  
57  
58  
59  
60



opportunities to 60 delegates from sub-Saharan Africa

<https://globalpharmacovigilance.tghn.org/resources/building-teratovigilance-capacity-africa/>.

## System strengthening

In addition to the employment of project-specific staff, embedded with computers at the facilities, the project supports on-going training of clinical staff to improve and standardize clinical history-taking with an emphasis on exposures, neonatal examination and clinical record keeping. Open resources include the WHO/TDR *Stepwise Surface Examination of the Newborn* (<https://www.who.int/tdr/publications/videos/stepwise-surface-examination-newborns/en/>) and the training modules for midwives we developed as part of the South African National Pregnancy Exposure Registry (<https://www.ubomibuhle.org.za/training-lessons>)[37]. These resources are freely available and are now in use at PER sites across South Africa.

## Strengths and Weaknesses

### Strengths

The integration of the PER within the PHDC greatly increases the completeness of the data. It facilitates identification of pregnancy outcomes at facilities outside our sentinel referral chains reducing loss to follow-up. Harmonization and triangulation of two data sources for medicine exposures (i.e., clinical records and electronic pharmacy records) provides a more robust summary of exposures than either alone[3, 17, 22]. These systems comprise unique infrastructure able to address clinical and public health concerns in a low-middle income setting.

1  
2  
3 Accurate timing of exposures over the course of pregnancy is crucial to assess potential associations  
4 with adverse pregnancy outcomes. Collecting multiple reference points for gestational age (i.e.,  
5 neonatal record, ultrasound, last menstrual period, symphysis-fundal height) enabled the  
6 development of a hierarchy of methods and the allocation of a confidence score to the reported  
7 gestational age[38-40]. This offers an advantage over insurance claims datasets which are often used  
8 to determine safety information and in which pregnancy and gestational age must be inferred from  
9 clinical coding alone.  
10  
11  
12  
13  
14  
15  
16  
17  
18  
19  
20  
21

22 In line with the TDR protocol [20], all women attending the PER primary care sites are enrolled and we  
23 reflect background rates of important pregnancy parameters similar to what is expected from national  
24 aggregate data. This will be expanded to include background rates for congenital disorders, data which  
25 are lacking in South Africa[41]. This structure also allows for the analysis of multiple current and  
26 potential future exposures and emerging health concerns e.g., novel medicines and vaccines such as  
27 for SARS-CoV-2. Determining the rates and associations of rare events such as major congenital  
28 anomalies requires large, representative samples. Such analyses necessitate resources for data  
29 cleaning and interpretation, especially to determine the timing of drug/teratogen exposures over the  
30 course of gestation. This work is currently underway in the PER.  
31  
32  
33  
34  
35  
36  
37  
38  
39  
40  
41  
42  
43  
44  
45

46 From the outset, it was important to avoid a parallel system and support project sustainability. The  
47 PER has been integrated into the existing clinical and clerical routines and uses local electronic health  
48 information platforms. It allows for electronic generation of key monthly indicators at primary care  
49 sites that are otherwise collected by hand.  
50  
51  
52  
53  
54  
55  
56  
57  
58  
59  
60

1  
2  
3 As the cohort expands, capacity to conduct nested studies that facilitate signal detection and signal  
4 verification of potential or suspected teratogens will improve. The collection of individual-level data  
5  
6 in a large prospectively enrolled cohort, representative of both urban and rural WC populations who  
7  
8 use public sector services will support more robust analyses that can better account for confounding  
9  
10 factors in such observational data.  
11  
12  
13  
14  
15  
16  
17

### 18 Weaknesses

19  
20  
21 The PER digitizes clinical data recorded in operational stationery and we cannot control for data quality  
22 nor account for missing data in the source documents, including the risk of under-reporting. To  
23 address this, we have engaged in on-going training at the sites with an emphasis on drug history taking,  
24 medical record-keeping and neonatal examination offering in-person teaching and video tutorials.  
25  
26 Clinical staff have been provided with Medicine Identification Aids with photographs of common  
27 formulations and packaging, and the WHO Birth Defects atlas[42]. However, misclassification remains  
28 a potential risk.  
29  
30  
31  
32  
33  
34  
35  
36  
37  
38  
39

40 Notwithstanding the advantages of the individual-level data available within the PHDC, data are  
41 limited to those that are entered into one of the electronic medical records systems used in the public  
42 sector. In terms of medicine exposures, the PER documents dispensed medication which may not  
43 reflect actual use. In addition, medicines obtained outside of the public sector systems, from private  
44 doctors or over-the-counter from pharmacies are not included unless they are noted in the clinical  
45 records[3]. Similarly, traditional and complementary medicines lack a linked electronic footprint and  
46 are not included.  
47  
48  
49  
50  
51  
52  
53  
54  
55  
56  
57  
58  
59  
60

1  
2  
3 The PER database is parsimonious by design and necessity and we are unable to account for  
4 unmeasured confounders. However, data fields are collected for the entire cohort who are all drawn  
5 from the same geographical areas served by the primary care clinics. Additionally, we record limited  
6 data on lifestyle factors relevant in pregnancy (weight gain, exposure to tobacco, alcohol, recreational  
7 drugs) which are lacking from equivalent population datasets based on insurance claims data.  
8  
9  
10  
11  
12  
13

### 14 15 Collaboration

16  
17  
18 As with the PHDC within which it is located, the PER can address clinical, operational and research  
19 needs, and data access is specific to each. Aggregate reports are available to managers. Data are  
20 anonymised using standard protocols for de-identifying records before they are shared with  
21 researchers who are not directly engaged in the women's clinical care. It is anticipated that such de-  
22 identified individual-level data may be shared as part of the South African National Pregnancy  
23 Registry[37] and with similar PER initiatives regionally or internationally[43]. Data-sharing  
24 commitments are particularly relevant to research of rare events such as congenital disorders[20]. The  
25 PHDC has in-built privacy systems and strict governance structures managing the protection and use  
26 of health data for both service and research purposes and these apply to the PER[21].  
27  
28  
29  
30  
31  
32  
33  
34  
35  
36  
37  
38  
39  
40  
41

### 42 Patient and public involvement

43  
44 The PER is integrated into the data collection and curation services of the Western Cape Government  
45 Department of Health and clinical and other service providers have engaged with the project since its  
46 inception. The data are available to managers as aggregate reports and to contribute to the electronic  
47 clinical records accessible by clinicians. Feedback from users contributes iteratively to optimization of  
48 the PER to improve health outcomes for pregnant women and infants.  
49  
50  
51  
52  
53  
54  
55  
56  
57  
58  
59  
60

## Conclusions

Research on medicine safety in pregnancy requires data on individual pregnancies, mother-infant linkage, medication exposure, gestational age at exposure, and maternal and birth outcomes. Data completeness and robustness continues to improve with on-going training, evolution of routine clinical information systems, and increasing political focus on pregnancy exposures. The cohort is well-placed to detect large signals in pregnancy outcomes as novel maternal exposures are introduced, and to contribute to cohort harmonization for rarer outcomes and address the lack of information on congenital disorders in Africa.

## Ethics approval

The WC PER has been approved by the Faculty of Health Sciences Human Research Ethics Committees of the University of Cape Town (HREC: 749/2015) and Stellenbosch University (N17/04/040, N20/08/084), and the Western Cape Government Health Research Committee. The requirement for individual informed consent was waived by the ethics committee and all data were anonymized before being transferred for analysis.

## Funding

This work was supported by the US National Institutes of Health [R01HD080465, U01AI069911, U01AI069924, K43TW010683], Bill and Melinda Gates Foundation [INV-004508; 1164272; 1191327; INV-004657], the Wellcome Trust [203135/Z/16/Z], the International AIDS Society [2017-518/SLO], the United States Agency for International Development [72067418CA00023] and the US Centers for Disease Control and Prevention [GH001934].

### Acknowledgements

We acknowledge and thank the PER data teams in Cape Town and Worcester, and the clinical and management staff at the facilities. The support and investment of the subdistrict and provincial health management is crucial to maintaining the initiative. We further acknowledge colleagues from the Western Cape Government: Health and the City of Cape Town.

### Author contributions

Conception and design: EK, UM, AB, ALS, MAD, LM

Design and Implementation including data systems: EK, UM, ALS, GP, KF, JE

Data harmonization: AH, FP, JE, AB, MAD, EK

Clinical oversight: GP, MK, CS, NR, SG, AO, KF

Data cleaning & analysis: EK, ALS, UM, KA, AH

All authors critically reviewed the manuscript.

### Conflict of interests

EK, AB, MAD and KA received funding from Viiv Healthcare unrelated to this project.

The authors declare no conflicts of interest.

## References

1. Daw JR, Hanley GE, Greyson DL, Morgan SG. Prescription drug use during pregnancy in developed countries: a systematic review. *Pharmacoepidemiol Drug Saf.* 2011;20(9):895-902.
2. Mohseni M, Azami-Aghdash S, Gareh Sheyklo S, Moosavi A, Nakhaee M, Pournaghi-Azar F, et al. Prevalence and Reasons of Self-Medication in Pregnant Women: A Systematic Review and Meta-Analysis. *Int J Community Based Nurs Midwifery.* 2018;6(4):272-84.
3. van der Hoven J, Allen E, de Waal R, Cois A, Maartens G, Myer L, et al. Antenatal medicine use in South African women: a comparison of three methods of ascertainment. *BMC Pregnancy Childbirth.* 2022;22(1):1-15
4. Zash R, Holmes L, Diseko M, Jacobson DL, Brummel S, Mayondi G, et al. Neural-Tube Defects and Antiretroviral Treatment Regimens in Botswana. *N Engl J Med.* 2019;381(9):827-40.
5. Zash R, Makhema J, Shapiro RL. Neural-Tube Defects with Dolutegravir Treatment from the Time of Conception. *N Engl J Med.* 2018;379(10):979-81.
6. Gupta A, Montepiedra G, Aaron L, Theron G, McCarthy K, Bradford S, et al. Isoniazid Preventive Therapy in HIV-Infected Pregnant and Postpartum Women. *N Engl J Med.* 2019;381(14):1333-46.
7. Bianchi DW, Kaeser L, Cernich AN. Involving Pregnant Individuals in Clinical Research on COVID-19 Vaccines. *JAMA.* 2021;325(11):1041-2.
8. World Health Organization. Module 1: Prevention, Tuberculosis Preventive Treatment in *Consolidated Guidelines on Tuberculosis* Geneva: World Health Organization; 2020 [Available from: <https://tbksp.org/en/node/43> .] (Accessed 17 March 2022)
9. World Health Organization. CONSOLIDATED GUIDELINES ON HIV PREVENTION, TESTING, TREATMENT, SERVICE DELIVERY AND MONITORING: RECOMMENDATIONS FOR A PUBLIC HEALTH APPROACH Geneva: World Health organization; 2021 [Available from: <https://www.who.int/publications/i/item/9789240031593> .] (Accessed 17 March 2022)
10. World Health Organization. COVID-19 vaccines: safety surveillance manual, second edition Geneva: World Health Organization; 2021 [Available from: <https://www.who.int/publications/i/item/10665345178> .] (Accessed 17 March 2022)
11. Craig AM, Hughes BL, Swamy GK. Coronavirus disease 2019 vaccines in pregnancy. *Am J Obstet Gynecol MFM.* 2021;3(2):100295.
12. Gupta A, Hughes MD, Garcia-Prats AJ, McIntire K, Hesselting AC. Inclusion of key populations in clinical trials of new antituberculosis treatments: Current barriers and recommendations for pregnant and lactating women, children, and HIV-infected persons. *PLoS Med.* 2019;16(8):e1002882.
13. Moodley J, Ngene NC, Khaliq OP, Hunter M. An imperative to offer pregnant and lactating women access to the COVID-19 vaccination roll-out programme. *S Afr Med J.* 2021;111(6):567-9.
14. World Health Organization, International Maternal Pediatric Adolescent AIDS Clinical Trials Network. APPROACHES TO ENHANCE AND ACCELERATE STUDY OF NEW DRUGS FOR HIV AND ASSOCIATED INFECTIONS IN PREGNANT WOMEN. Geneva: World Health Organization; 2021. [https://www.who.int/publications/i/item/9789240040182]. (Accessed 17 March 2022)
15. Holmes LB, Wyszynski DF. North American antiepileptic drug pregnancy registry. *Epilepsia.* 2004;45(11):1465.
16. Scheuerle A, Covington D. Clinical review procedures for the Antiretroviral Pregnancy Registry. *Pharmacoepidemiol Drug Saf.* 2004;13(8):529-36.
17. Gelperin K, Hammad H, Leishear K, Bird ST, Taylor L, Hampp C, et al. A systematic review of pregnancy exposure registries: examination of protocol-specified pregnancy outcomes, target sample size, and comparator selection. *Pharmacoepidemiol Drug Saf.* 2017;26(2):208-14.
18. Berrueta M, Ciapponi A, Bardach A, Cairoli FR, Castellano FJ, Xiong X, et al. Maternal and neonatal data collection systems in low- and middle-income countries for maternal vaccines active safety surveillance systems: A scoping review. *BMC Pregnancy Childbirth.* 2021;21(1):217.
19. Mehta U, Kalk E, Fairlie L, Boulle A, Rees H. Why South Africa urgently needs to support the development of pregnancy exposure registries. *S Afr Med J.* 2019;109(5):294-5.

- 1
- 2
- 3
- 4 20. Mehta U, Clerk C, Allen E, Yore M, Sevene E, Singlovic J, et al. Protocol for a drugs exposure
- 5 pregnancy registry for implementation in resource-limited settings. *BMC Pregnancy Childbirth.*
- 6 *2012;12:89.*
- 7 21. Boulle A, Heekes A, Tiffin N, Smith M, Mutemaringa T, Zinyakatira N, et al. Data Centre Profile:
- 8 The Provincial Health Data Centre of the Western Cape Province, South Africa. *Int J Popul Data Sci.*
- 9 *2019;4(2):1143.*
- 10 22. Mehta U, Heekes A, Kalk E, Boulle A. Assessing the value of Western Cape Provincial
- 11 Government health administrative data and electronic pharmacy records in ascertaining medicine use
- 12 during pregnancy. *S Afr Med J.* 2018;108(5):439-43.
- 13 23. Okoli GN, Myles P, Murray-Thomas T, Shepherd H, Wong ICK, Edwards D. Use of Primary Care
- 14 Data in Research and Pharmacovigilance: Eight Scenarios Where Prescription Data are Absent. *Drug*
- 15 *Saf.* 2021;44(10):1033-1040.
- 16 24. Day C, Gray C, Padayachee T, Cois A. Chapter 20, Health and Related Indicators. *South African*
- 17 *Health Review 2020.* 2020.
- 18 25. South African Department of Health. Guideline for the Prevention of Mother to Child
- 19 Transmission of Communicable Infections. In: Health, editor. Pretoria. November 2019. [Available
- 20 from: [https://www.nicd.ac.za/wp-content/uploads/2019/11/Guidelines-for-the-Prevention-of-](https://www.nicd.ac.za/wp-content/uploads/2019/11/Guidelines-for-the-Prevention-of-Transmission-of-Communicable-Diseases-from-mother-to-child_28-October.pdf)
- 21 [Transmission-of-Communicable-Diseases-from-mother-to-child\\_28-October.pdf](https://www.nicd.ac.za/wp-content/uploads/2019/11/Guidelines-for-the-Prevention-of-Transmission-of-Communicable-Diseases-from-mother-to-child_28-October.pdf)]
- 22 26. World Health Organization. WHO recommendations on antenatal care for a positive
- 23 pregnancy experience. Geneva: WHO Library Cataloguing-in-Publication Data; 2016. [Available from:
- 24 <https://www.who.int/publications/i/item/9789241549912>]
- 25 27. Holmes LB, Nasri HZ, Hunt AT, Zash R, Shapiro RL. Limited surface examination to evaluate
- 26 potential teratogens in a resource-limited setting. *Birth Defects Res.* 2021;113(9):702-7.
- 27 28. Bonhoeffer J, Kochhar S, Hirschfeld S, Heath PT, Jones CE, Bauwens J, et al. Global alignment
- 28 of immunization safety assessment in pregnancy - The GAIA project. *Vaccine.* 2016;34(49):5993-7.
- 29 29. Andrade SE, Berard A, Nordeng HME, Wood ME, van Gelder M, Toh S. Administrative Claims
- 30 Data Versus Augmented Pregnancy Data for the Study of Pharmaceutical Treatments in Pregnancy. *Curr Epidemiol Rep.* 2017;4(2):106-16.
- 31 30. Grzeskowiak LE, Gilbert AL, Morrison JL. Investigating outcomes associated with medication
- 32 use during pregnancy: a review of methodological challenges and observational study designs. *Reprod*
- 33 *Toxicol.* 2012;33(3):280-9.
- 34 31. Massyn N, Day C, Ndlovu N, Padayachee T. District Health Barometer 2019/2020. Durban:
- 35 Health Systems Trust; 2020. [Available from:
- 36 [https://www.hst.org.za/publications/District%20Health%20Barometers/DHB%202019-](https://www.hst.org.za/publications/District%20Health%20Barometers/DHB%202019-20%20Complete%20Book.pdf)
- 37 [20%20Complete%20Book.pdf](https://www.hst.org.za/publications/District%20Health%20Barometers/DHB%202019-20%20Complete%20Book.pdf) ]
- 38 32. National Perinatal Mortality and Morbidity Committee. NPEMMCO Triennial Report 2017 -
- 39 2019. 2017-2019.
- 40 33. Provincial Perinatal Morbidity and Mortality Committee. Western Cape Saving Babies Triennial
- 41 Report 2017 -2019. 2020.
- 42 34. Slogrove A, Davies MA, Williams P, Abrams E, Theron G, Cotton M, et al., editors. Hypertensive
- 43 Disorders in Pregnancy and HIV: A Province-wide Cohort Analysis during 2018 and 2019 in the Western
- 44 Cape, South Africa. 13th International Workshop on HIV Pediatrics; 2021 16-17 July 2021; virtual.
- 45 35. Kalk E, Heekes A, Mehta U, de Waal R, Jacob N, Cohen K, et al. Safety and Effectiveness of
- 46 Isoniazid Preventive Therapy in Pregnant Women Living with Human Immunodeficiency Virus on
- 47 Antiretroviral Therapy: An Observational Study Using Linked Population Data. *Clin Infect Dis.*
- 48 *2020;71(8):e351-e8.*
- 49 36. Mehta U, Smith M, Kalk E, Hayes H, Swart A, Tucker L, et al. Understanding and Responding
- 50 to Prescribing Patterns of Sodium Valproate-Containing Medicines in Pregnant Women and Women
- 51 of Childbearing Age in Western Cape, South Africa. *Drug Saf.* 2021;44(1):41-51.
- 52 37. Ubomi Buhle, Understanding Birth Outcomes for Mothers and Infants: Building Healthcare by
- 53 Linking Exposures 2021 [Available from: [https://www.ubomibuhle.org.za/.](https://www.ubomibuhle.org.za/)]
- 54
- 55
- 56
- 57
- 58
- 59
- 60



- 1  
2  
3 38. Geerts L, Poggenpoel E, Theron G. A comparison of pregnancy dating methods commonly used  
4 in South Africa: a prospective study. *S Afr Med J*. 2013;103(8):552-6.  
5 39. Malaba TR, Newell ML, Madlala H, Perez A, Gray C, Myer L. Methods of gestational age  
6 assessment influence the observed association between antiretroviral therapy exposure, preterm  
7 delivery, and small-for-gestational age infants: a prospective study in Cape Town, South Africa. *Ann*  
8 *Epidemiol*. 2018;28(12):893-900.  
9 40. Quinn JA, Munoz FM, Gonik B, Frau L, Cutland C, Mallett-Moore T, et al. Preterm birth: Case  
10 definition & guidelines for data collection, analysis, and presentation of immunisation safety data.  
11 *Vaccine*. 2016;34(49):6047-56.  
12 41. Lebeso V, Aldous C, Malherbe HL. South African congenital disorders data, 2006 - 2014. *S Afr*  
13 *Med J*. 2016;106(10):992-5.  
14 42. WHO/CDC/ICBDSR. Birth defects surveillance: atlas of selected congenital anomalies. Geneva:  
15 World Health Organization; 2015. [Available from: <https://apps.who.int/iris/handle/10665/127941> ]  
16 43. International epidemiology Databases to Evaluate AIDS (IeDEA)-East Africa. Measuring  
17 Adverse Pregnancy & Newborn Outcomes (MANGO): an IeDEA Collaboration Study 2021 [Available  
18 from: <https://globalhealth.iu.edu/research/iedea-main-page/>.]  
19  
20  
21  
22  
23  
24  
25  
26  
27  
28  
29  
30  
31  
32  
33  
34  
35  
36  
37  
38  
39  
40  
41  
42  
43  
44  
45  
46  
47  
48  
49  
50  
51  
52  
53  
54  
55  
56  
57  
58  
59  
60

Table 1. Summary of Data Elements in the PER

| Variables collected                                                                                                                                                                                                                                                                                                                              | Calculated parameters                                                                                                               | MOU aggregate statistics                                                                                                                                                                                                                              |
|--------------------------------------------------------------------------------------------------------------------------------------------------------------------------------------------------------------------------------------------------------------------------------------------------------------------------------------------------|-------------------------------------------------------------------------------------------------------------------------------------|-------------------------------------------------------------------------------------------------------------------------------------------------------------------------------------------------------------------------------------------------------|
| <i>Antenatal</i><br>Maternal date of birth<br>Date of first antenatal visit<br>Last menstrual period<br>Parity, Gravidity<br>Obstetric & Medical history<br>Chronic medication<br>Height, mid-upper arm circumference, weight, blood pressure, urinalysis<br>Symphysis fundal height<br>Alcohol, tobacco, drug use<br>Number of antenatal visits | Gestational age at first antenatal visit                                                                                            | Number of first visits<br>Number of women first ANC < 20 weeks<br>Number age < 20 years or > 38 years<br>Number grand multipara (≥ 5 deliveries)<br>Number high blood pressure/proteinuria                                                            |
| <i>Vertical transmission of HIV</i><br>HIV status at first antenatal visit<br>Subsequent positive HIV test<br>HIV treatment incl. regimen switches<br>CD4 count<br>Viral load<br>HIV-exposed infant HIV-PCR                                                                                                                                      | Number of women at high risk of vertical HIV transmission<br>ART in hand at estimated time of conception<br>ART in hand at delivery | Number of women living with HIV:<br>Before pregnancy<br>During pregnancy<br>Number of women on ART (1 <sup>st</sup> & 2 <sup>nd</sup> line):<br>Before, during pregnancy<br>VL unsuppressed at pregnancy & delivery<br>Number of infant birth HIV-PCR |
| <i>Ultrasound</i><br>Gestational age<br>Abnormalities<br>Expected date of delivery                                                                                                                                                                                                                                                               |                                                                                                                                     | Number of ultrasounds conducted<br>Number multiple pregnancies                                                                                                                                                                                        |
| <i>Maternal outcome</i><br>Facility-based death                                                                                                                                                                                                                                                                                                  | Vital status                                                                                                                        | Maternal death                                                                                                                                                                                                                                        |
| <i>Peri-partum</i><br>Date & site of outcome                                                                                                                                                                                                                                                                                                     |                                                                                                                                     | Number of deliveries                                                                                                                                                                                                                                  |

|                                                                                                                                                                                         |                                                                                                                          |                                                                                                                      |
|-----------------------------------------------------------------------------------------------------------------------------------------------------------------------------------------|--------------------------------------------------------------------------------------------------------------------------|----------------------------------------------------------------------------------------------------------------------|
| Method of delivery<br>Gestational age at outcome                                                                                                                                        | Prematurity (< 37 completed weeks gestation)                                                                             |                                                                                                                      |
| <i>Pregnancy outcome</i><br>Livebirth<br>Stillbirth<br>Miscarriage<br>Termination of pregnancy<br>Ectopic pregnancy<br>Molar pregnancy                                                  | Gestational age at pregnancy outcome                                                                                     | Number of livebirths, stillbirths, miscarriages                                                                      |
| <i>Neonate</i><br>Date of birth<br>Sex, APGAR scores<br>Gestational age<br>Birth weight, length, head circumference, foot length<br>Neonatal surface examination<br>Abnormalities noted | Gestational age at birth<br>Low birth weight (< 2500g)<br>Prematurity (< 37 completed weeks gestation)<br>Neonatal death | Number of low birth weight infants<br>Number premature infants<br>Number neonatal deaths<br>Perinatal mortality rate |

ANC – antenatal care; ART – antiretroviral therapy; HIV – Human Immune Deficiency Virus; MOU – midwife obstetric unit; PCR – polymerase chain reaction

Table 2. Maternal and obstetric characteristics of the cohort 2018-2019

| Variable                                       | PER total<br>n = 14 527 | PER urban<br>n = 9435 (65%) | PER rural<br>n = 5092 (35%) |
|------------------------------------------------|-------------------------|-----------------------------|-----------------------------|
| Age (years) median (IQR)                       | 27 (23 – 32)            | 28 (23 – 33)                | 26 (22 – 31)                |
| Living with HIV at pregnancy outcome           | 3931 (27.1)             | 3241 (34.3)                 | 690 (13.6)                  |
| Obstetric ultrasound present n (%)             | 5583 (38.4)             | 4063 (43.1)                 | 1520 (29.9)                 |
| Early ultrasound (i.e. < 22 weeks) n (% of US) | 3345 (59.9)             | 2393 (58.9)                 | 952 (62.6)                  |
| Potentially unsafe medicine exposure           | 1287 (9.0)              | 857 (9.3)                   | 430 (8.5)                   |
| Gestational age at birth (weeks) median (IQR)  | 40 (37 – 40)            | 40 (36 – 40)                | 39 (35 – 40)                |
| Birth weight (grams) median (IQR)              | 3100 (2750 – 3440)      | 3140 (2800 – 3480)          | 2975 (2575 – 3320)          |
| Low birth weight <sup>a</sup> n (%)            | 1736 (12.0)             | 879 (9.3)                   | 857 (16.8)                  |
| Premature birth <sup>b</sup> n(%)              | 2949 (20.3)             | 1735 (18.4)                 | 1214 (23.8)                 |
| Pregnancy outcome n (%)                        |                         |                             |                             |
| Live birth                                     | 12 419 (85.5)           | 1189 (82.3)                 | 4630 (90.9)                 |
| Still birth                                    | 296 (2.0)               | 180 (1.9)                   | 116 (2.3)                   |
| Neonatal death <sup>c</sup>                    | 109 (0.8)               | 71 (0.5)                    | 36 (0.7)                    |
| Miscarriage                                    | 395 (2.7)               | 318 (3.4)                   | 77 (1.5)                    |
| Ectopic pregnancy                              | 82 (0.6)                | 60 (0.6)                    | 22 (0.4)                    |
| Termination of pregnancy                       | 273 (1.9)               | 223 (2.4)                   | 50 (1.0)                    |
| Unknown                                        | 953 (6.6)               | 792 (8.4)                   | 161 (3.1)                   |
| Delivery method <sup>d</sup> n(%)              |                         |                             |                             |
| Born before arrival at birthing facility       | 608 (4.7)               | 245 (3.1)                   | 363 (7.6)                   |
| Vaginal delivery                               | 7587 (59.2)             | 4655 (57.9)                 | 2932 (61.3)                 |
| Assisted delivery <sup>e</sup>                 | 140 (1.1)               | 51 (0.6)                    | 89 (1.9)                    |
| Caesarean section                              | 3416 (26.6)             | 2411 (30.0)                 | 1005 (21.0)                 |
| Unknown                                        | 1073 (8.4)              | 680 (8.5)                   | 393 (8.2)                   |
| Infant outcome <sup>d</sup> n(%)               |                         |                             |                             |
| Stillborn                                      | 296 (2.3)               | 180 (2.2)                   | 116 (2.4)                   |
| Early neonatal death <sup>c</sup>              | 80 (0.6)                | 55 (0.7)                    | 25 (0.5)                    |
| Late neonatal death                            | 29 (0.2)                | 18 (0.2)                    | 11 (0.2)                    |
| Alive                                          | 12 419 (96.8)           | 7798 (96.9)                 | 4630 (96.8)                 |
| Tobacco use <sup>f</sup> n(%)                  |                         |                             |                             |
| Current user                                   | 1297 (8.9)              | 87 (0.9)                    | 1210 (23.8)                 |
| Past user                                      | 55 (0.4)                | 13 (0.1)                    | 42 (0.8)                    |
| Never user                                     | 9997 (68.8)             | 7222 (76.5)                 | 2775 (54.5)                 |
| Not reported                                   | 3178 (21.9)             | 2113 (14.5)                 | 1065 (7.3)                  |
| Alcohol use <sup>f</sup> n(%)                  |                         |                             |                             |
| Current user                                   | 588 (4.1)               | 339 (3.6)                   | 249 (4.9)                   |
| Past user                                      | 167 (1.2)               | 66 (0.7)                    | 101 (2.0)                   |
| Never user                                     | 10 570 (72/8)           | 6885 (73.0)                 | 3685 (72.4)                 |
| Not reported                                   | 3202 (22.0)             | 2145 (14.8)                 | 1057 (7.3)                  |

<sup>a</sup> birthweight<2500g; liveborn infants only

<sup>b</sup> birth < 37 completed weeks gestation; liveborn infants only

1  
2  
3 <sup>c</sup> neonatal death: death before 28 days of life; early neonatal death: death before 7 days of  
4 life; late neonatal death: death between 8 and 28 days of life

5  
6 <sup>d</sup> viable pregnancies (i.e. >27 weeks gestation(17)) (n=12 824)

7 <sup>e</sup> forceps or vacuum delivery

8 <sup>f</sup> reported at first antenatal visit  
9  
10  
11  
12  
13  
14  
15  
16  
17  
18  
19  
20  
21  
22  
23  
24  
25  
26  
27  
28  
29  
30  
31  
32  
33  
34  
35  
36  
37  
38  
39  
40  
41  
42  
43  
44  
45  
46  
47  
48  
49  
50  
51  
52  
53  
54  
55  
56  
57  
58  
59  
60

For peer review only

Table 3. Comparison between PER reported or calculated PER outcomes and aggregate indicators in formal provincial information systems

| Indicator                                                            | PER total<br>n = 14 527 | PER urban<br>n = 9435 (65%) | PER rural<br>n = 5092 (35%) | Reported aggregate for<br>the Western Cape 2017<br>- 2019 <sup>a</sup> |
|----------------------------------------------------------------------|-------------------------|-----------------------------|-----------------------------|------------------------------------------------------------------------|
| Still birth <sup>b</sup> n (%)                                       | 296 (2.0)               | 180 (1.9)                   | 116 (2.4)                   | 2.2% <sup>33</sup>                                                     |
| Per 1000 births                                                      | 20.0                    | 19.1                        | 24.0                        | 18.5 <sup>31</sup><br>22.1 <sup>31-32</sup>                            |
| Neonatal death in facility<br>rate <sup>c</sup> per 1000 live births | 8.7                     | 9.2                         | 7.7                         | 8.9 <sup>31-32</sup>                                                   |
| Perinatal mortality rate <sup>d</sup><br>per 1000 births             | 29                      | 29                          | 29                          | 25.6 <sup>31</sup><br>27.9 <sup>32</sup><br>29.1 <sup>33</sup>         |
| Low birth weight <sup>e</sup> n(%)                                   | 1737 (12.0)             | 879 (9.3)                   | 857 (16.8)                  | 14.9% urban subdistrict<br>18.4% rural subdistrict <sup>33</sup>       |
| Maternal mortality in facility<br>ratio per 100 000 live births      |                         | 63.5                        | Insufficient<br>data        | 43.6 – 66.8 <sup>32</sup>                                              |
| Teenage pregnancies (10 –<br>19 years) n(%)                          | 929 (6.4)               | 450 (4.8)                   | 497 (9.4)                   | 3.5% urban subdistrict<br>7.3% rural subdistrict <sup>33</sup>         |
| Caesarean section rate per<br>1000 births                            | 3416 (26.6)             | 2411 (30.0)                 | 1005 (21.0)                 | 28.9 <sup>32</sup> - 29.3 <sup>33</sup>                                |

<sup>a</sup> includes aggregate reports compiled from the District Health Information System and Perinatal Problem Identification Programme<sup>31-33</sup>

<sup>b</sup> delivery of a baby with no signs of life after 27 completed weeks of gestation (i.e., viable baby born dead)

<sup>c</sup> death before 28 days of life

<sup>d</sup> still birth plus neonatal deaths <8 days per 1000 births

<sup>e</sup> birthweight<2500g; liveborn infants only

1  
2  
3  
4  
5  
6  
7  
8  
9  
10  
11  
12  
13  
14  
15  
16  
17  
18  
19  
20  
21  
22  
23  
24  
25  
26  
27  
28  
29  
30  
31  
32  
33  
34  
35  
36  
37  
38  
39  
40  
41  
42  
43  
44  
45  
46  
47  
48  
49  
50  
51  
52  
53  
54  
55  
56  
57  
58  
59  
60

For peer review only

Supplementary Table 1. Potentially unsafe medicines, excluding ART, identified in the PER over the course of gestation (alphabetical)

| Name                            |
|---------------------------------|
| Carbamazepine                   |
| Carbimazole                     |
| Diazepam                        |
| Doxycycline                     |
| Enalapril                       |
| Gentamicin                      |
| Ibuprofen                       |
| Lithium                         |
| Losartan                        |
| Phenytoin                       |
| Sulfamethoxazole & trimethoprim |
| Valproate                       |
| Warfarin                        |

ART – antiretroviral therapy



STROBE Statement—Checklist of items that should be included in reports of *cohort studies*

|                              | Item No | Recommendation                                                                                                                                                                                    | page                                                  |
|------------------------------|---------|---------------------------------------------------------------------------------------------------------------------------------------------------------------------------------------------------|-------------------------------------------------------|
| <b>Title and abstract</b>    | 1       | (a) Indicate the study's design with a commonly used term in the title or the abstract                                                                                                            | 1                                                     |
|                              |         | (b) Provide in the abstract an informative and balanced summary of what was done and what was found                                                                                               | 3                                                     |
| <b>Introduction</b>          |         |                                                                                                                                                                                                   |                                                       |
| Background/rationale         | 2       | Explain the scientific background and rationale for the investigation being reported                                                                                                              | 5-7                                                   |
| Objectives                   | 3       | State specific objectives, including any prespecified hypotheses                                                                                                                                  | 7                                                     |
| <b>Methods</b>               |         |                                                                                                                                                                                                   |                                                       |
| Study design                 | 4       | Present key elements of study design early in the paper                                                                                                                                           | 7-8                                                   |
| Setting                      | 5       | Describe the setting, locations, and relevant dates, including periods of recruitment, exposure, follow-up, and data collection                                                                   | 7 - 10                                                |
| Participants                 | 6       | (a) Give the eligibility criteria, and the sources and methods of selection of participants. Describe methods of follow-up                                                                        | 8-9                                                   |
|                              |         | (b) For matched studies, give matching criteria and number of exposed and unexposed                                                                                                               | N/A                                                   |
| Variables                    | 7       | Clearly define all outcomes, exposures, predictors, potential confounders, and effect modifiers. Give diagnostic criteria, if applicable                                                          | 11-12, 16                                             |
| Data sources/<br>measurement | 8*      | For each variable of interest, give sources of data and details of methods of assessment (measurement). Describe comparability of assessment methods if there is more than one group              | 11-12<br>Table 1                                      |
| Bias                         | 9       | Describe any efforts to address potential sources of bias                                                                                                                                         | 14-16                                                 |
| Study size                   | 10      | Explain how the study size was arrived at                                                                                                                                                         | N/A                                                   |
| Quantitative variables       | 11      | Explain how quantitative variables were handled in the analyses. If applicable, describe which groupings were chosen and why                                                                      | 12-13<br>Tables 2-4                                   |
| Statistical methods          | 12      | (a) Describe all statistical methods, including those used to control for confounding                                                                                                             | Cohort<br><i>description</i> ;<br>limited<br>analyses |
|                              |         | (b) Describe any methods used to examine subgroups and interactions                                                                                                                               | N/A                                                   |
|                              |         | (c) Explain how missing data were addressed                                                                                                                                                       | 14-16                                                 |
|                              |         | (d) If applicable, explain how loss to follow-up was addressed                                                                                                                                    | 16                                                    |
|                              |         | (e) Describe any sensitivity analyses                                                                                                                                                             | 12-13                                                 |
| <b>Results</b>               |         |                                                                                                                                                                                                   |                                                       |
| Participants                 | 13*     | (a) Report numbers of individuals at each stage of study—eg numbers potentially eligible, examined for eligibility, confirmed eligible, included in the study, completing follow-up, and analysed | 12-13                                                 |
|                              |         | (b) Give reasons for non-participation at each stage                                                                                                                                              | N/A                                                   |
|                              |         | (c) Consider use of a flow diagram                                                                                                                                                                |                                                       |
| Descriptive data             | 14*     | (a) Give characteristics of study participants (eg demographic, clinical, social) and information on exposures and potential confounders                                                          | 12-13<br>Tables 2-4                                   |
|                              |         | (b) Indicate number of participants with missing data for each variable of interest                                                                                                               | N/A                                                   |
|                              |         | (c) Summarise follow-up time (eg, average and total amount)                                                                                                                                       | N/A                                                   |
| Outcome data                 | 15*     | Report numbers of outcome events or summary measures over time                                                                                                                                    | 12-13                                                 |

Tables 2-4

|    |                          |    |                                                                                                                                                                                                              |            |
|----|--------------------------|----|--------------------------------------------------------------------------------------------------------------------------------------------------------------------------------------------------------------|------------|
| 1  |                          |    |                                                                                                                                                                                                              | Tables 2-4 |
| 2  | Main results             | 16 | (a) Give unadjusted estimates and, if applicable, confounder-adjusted estimates and their precision (eg, 95% confidence interval). Make clear which confounders were adjusted for and why they were included | N/A        |
| 3  |                          |    | (b) Report category boundaries when continuous variables were categorized                                                                                                                                    | N/A        |
| 4  |                          |    | (c) If relevant, consider translating estimates of relative risk into absolute risk for a meaningful time period                                                                                             |            |
| 5  | Other analyses           | 17 | Report other analyses done—eg analyses of subgroups and interactions, and sensitivity analyses                                                                                                               | N/A        |
| 6  | <b>Discussion</b>        |    |                                                                                                                                                                                                              |            |
| 7  | Key results              | 18 | Summarise key results with reference to study objectives                                                                                                                                                     | 13-14      |
| 8  | Limitations              | 19 | Discuss limitations of the study, taking into account sources of potential bias or imprecision. Discuss both direction and magnitude of any potential bias                                                   | 16         |
| 9  | Interpretation           | 20 | Give a cautious overall interpretation of results considering objectives, limitations, multiplicity of analyses, results from similar studies, and other relevant evidence                                   | 17-18      |
| 10 | Generalisability         | 21 | Discuss the generalisability (external validity) of the study results                                                                                                                                        | 14, 17- 18 |
| 11 | <b>Other information</b> |    |                                                                                                                                                                                                              |            |
| 12 | Funding                  | 22 | Give the source of funding and the role of the funders for the present study and, if applicable, for the original study on which the present article is based                                                | 18         |

\*Give information separately for exposed and unexposed groups.

**Note:** An Explanation and Elaboration article discusses each checklist item and gives methodological background and published examples of transparent reporting. The STROBE checklist is best used in conjunction with this article (freely available on the Web sites of PLoS Medicine at <http://www.plosmedicine.org/>, Annals of Internal Medicine at <http://www.annals.org/>, and Epidemiology at <http://www.epidem.com/>). Information on the STROBE Initiative is available at <http://www.strobe-statement.org>.
