# Supplementary material for: Cohort profile: the Western Cape Pregnancy Exposure Registry (WCPER)
Source: PubMed Central journal article supplement (PMC9244673; doi:10.1136/bmjopen-2021-060205), 2022-06-29
Supplement: bmjopen-2021-060205supp001.pdf [file bmjopen-2021-060205supp001.pdf]

Supplementary Table 1. Potentially unsafe medicines, excluding ART, identified in the PER over the course of gestation (alphabetical)

| <b>Name</b>                     |
|---------------------------------|
| Carbamazepine                   |
| Carbimazole                     |
| Diazepam                        |
| Doxycycline                     |
| Enalapril                       |
| Gentamicin                      |
| Ibuprofen                       |
| Lithium                         |
| Losartan                        |
| Phenytoin                       |
| Sulfamethoxazole & trimethoprim |
| Valproate                       |
| Warfarin                        |

ART – antiretroviral therapy
